# Supplementary material for: Transcriptional and Histochemical Signatures of Bone Marrow Mononuclear Cell-Mediated Resolution of Synovitis
Source: Front Immunol. 2021 Dec 8;12:734322. doi: 10.3389/fimmu.2021.734322 (PMC8692379; doi:10.3389/fimmu.2021.734322)
Supplement: Supplementary file 4 [file Table_3.xlsx]

## Sheet: Blue Module
Category	Term	Count	%	PValue	Genes	List Total	Pop Hits	Pop Total	Fold Enrichment	Bonferroni	Benjamini	FDR
GOTERM_BP_DIRECT	GO:0090666~scaRNA localization to Cajal body	4	0.000917193	0.0142162	TCP1, CCT4, WRAP53, CCT2	1916	4	12023	6.27505	1	0.801868	23.2091
GOTERM_BP_DIRECT	GO:0008299~isoprenoid biosynthetic process	8	0.00183439	6.8806e-05	COQ2, HMGCR, FDPS, HMGCS1, GGPS1, MVK, PDSS1, PDSS2	1916	9	12023	5.57782	0.226418	0.0621648	0.126829
GOTERM_BP_DIRECT	GO:0032434~regulation of proteasomal ubiquitin-dependent protein catabolic process	8	0.00183439	0.000197648	RAD23B, UBE2K, RAD23A, GNA12, GLMN, UBQLN4, DDA1, GBA	1916	10	12023	5.02004	0.52169	0.137137	0.363912
GOTERM_BP_DIRECT	GO:0030203~glycosaminoglycan metabolic process	4	0.000917193	0.0313385	GNS, HEXA, HEXB, CLN6	1916	5	12023	5.02004	1	0.915828	44.4149
GOTERM_BP_DIRECT	GO:0070475~rRNA base methylation	4	0.000917193	0.0313385	NOP2, EMG1, METTL16, NSUN5	1916	5	12023	5.02004	1	0.915828	44.4149
GOTERM_BP_DIRECT	GO:0045040~protein import into mitochondrial outer membrane	4	0.000917193	0.0313385	HSP90AA1, SAMM50, HSPA4, TOMM22	1916	5	12023	5.02004	1	0.915828	44.4149
GOTERM_BP_DIRECT	GO:0035542~regulation of SNARE complex assembly	4	0.000917193	0.0313385	VPS18, STXBP6, VPS16, VPS11	1916	5	12023	5.02004	1	0.915828	44.4149
GOTERM_BP_DIRECT	GO:0071038~nuclear polyadenylation-dependent tRNA catabolic process	4	0.000917193	0.0313385	EXOSC8, EXOSC9, EXOSC2, EXOSC3	1916	5	12023	5.02004	1	0.915828	44.4149
GOTERM_BP_DIRECT	GO:0019725~cellular homeostasis	4	0.000917193	0.0313385	TNS2, ATG5, RHOT1, FBXO4	1916	5	12023	5.02004	1	0.915828	44.4149
GOTERM_BP_DIRECT	GO:0046825~regulation of protein export from nucleus	4	0.000917193	0.0313385	XPO1, XPO5, UHMK1, PTPN11	1916	5	12023	5.02004	1	0.915828	44.4149
GOTERM_BP_DIRECT	GO:1904871~positive regulation of protein localization to Cajal body	6	0.00137579	0.00373955	CCT7, TCP1, CCT5, CCT4, CCT2, CCT3	1916	8	12023	4.70629	0.999999	0.502878	6.67678
GOTERM_BP_DIRECT	GO:0034475~U4 snRNA 3'-end processing	5	0.00114649	0.0149777	EXOSC8, EXOSC9, EXOSC5, EXOSC2, EXOSC3	1916	7	12023	4.48218	1	0.799852	24.2958
GOTERM_BP_DIRECT	GO:0042274~ribosomal small subunit biogenesis	5	0.00114649	0.0149777	NOM1, SURF6, NAT10, UTP11, LTV1	1916	7	12023	4.48218	1	0.799852	24.2958
GOTERM_BP_DIRECT	GO:0006999~nuclear pore organization	5	0.00114649	0.0149777	NDC1, SEH1L, NUP205, NUP54, NUP35	1916	7	12023	4.48218	1	0.799852	24.2958
GOTERM_BP_DIRECT	GO:0097067~cellular response to thyroid hormone stimulus	6	0.00137579	0.00731442	LMO2, KLF9, RDX, CTSS, CTSB, CTSH	1916	9	12023	4.18337	1	0.651277	12.6636
GOTERM_BP_DIRECT	GO:1904851~positive regulation of establishment of protein localization to telomere	6	0.00137579	0.00731442	CCT7, TCP1, CCT5, CCT4, WRAP53, CCT2	1916	9	12023	4.18337	1	0.651277	12.6636
GOTERM_BP_DIRECT	GO:0043928~exonucleolytic nuclear-transcribed mRNA catabolic process involved in deadenylation-dependent decay	6	0.00137579	0.00731442	EXOSC8, EXOSC9, EXOSC5, EXOSC2, EXOSC3, CNOT7	1916	9	12023	4.18337	1	0.651277	12.6636
GOTERM_BP_DIRECT	GO:0051131~chaperone-mediated protein complex assembly	6	0.00137579	0.00731442	HSP90AA1, PFDN6, MKKS, HSPA4, CCT2, BBS10	1916	9	12023	4.18337	1	0.651277	12.6636
GOTERM_BP_DIRECT	GO:0006607~NLS-bearing protein import into nucleus	10	0.00229298	0.000254177	IPO5, DAG1, KPNA6, NUP54, KPNA4, KPNA3, NUP35, KPNA2, TNPO1, KPNB1	1916	16	12023	3.92191	0.612661	0.111799	0.467765
GOTERM_BP_DIRECT	GO:0006623~protein targeting to vacuole	5	0.00114649	0.0262158	VPS13C, VTI1B, GOSR2, VPS13A, VTI1A	1916	8	12023	3.92191	1	0.894878	38.7357
GOTERM_BP_DIRECT	GO:0000467~exonucleolytic trimming to generate mature 3'-end of 5.8S rRNA from tricistronic rRNA transcript (SSU-rRNA, 5.8S rRNA, LSU-rRNA)	5	0.00114649	0.0262158	EXOSC8, EXOSC9, EXOSC2, EXOSC3, ERI3	1916	8	12023	3.92191	1	0.894878	38.7357
GOTERM_BP_DIRECT	GO:0034427~nuclear-transcribed mRNA catabolic process, exonucleolytic, 3'-5'	5	0.00114649	0.0262158	EXOSC8, EXOSC9, EXOSC5, EXOSC2, EXOSC3	1916	8	12023	3.92191	1	0.894878	38.7357
GOTERM_BP_DIRECT	GO:0071498~cellular response to fluid shear stress	5	0.00114649	0.0262158	MEF2C, MTSS1, HDAC3, PKD2, SRC	1916	8	12023	3.92191	1	0.894878	38.7357
GOTERM_BP_DIRECT	GO:1904874~positive regulation of telomerase RNA localization to Cajal body	9	0.00206369	0.000914551	CCT7, TCP1, CCT5, CCT4, CCT2, RUVBL1, CCT3, NOP10, SHQ1	1916	15	12023	3.76503	0.967083	0.216387	1.6734
GOTERM_BP_DIRECT	GO:0032543~mitochondrial translation	11	0.00252228	0.000236462	QRSL1, MRPS16, MRPS18C, MRPS15, PTRH1, MRPS18A, PTCD3, CHCHD1, HARS, MRPL47, GATC	1916	19	12023	3.63292	0.586188	0.118429	0.43523
GOTERM_BP_DIRECT	GO:0051443~positive regulation of ubiquitin-protein transferase activity	9	0.00206369	0.00157493	UBE2N, LOC102150222, DCUN1D2, TRIB3, DCUN1D3, DCUN1D4, DCUN1D5, LOC100058286, PIN1	1916	16	12023	3.52972	0.997207	0.307566	2.86522
GOTERM_BP_DIRECT	GO:0000463~maturation of LSU-rRNA from tricistronic rRNA transcript (SSU-rRNA, 5.8S rRNA, LSU-rRNA)	5	0.00114649	0.0413369	RPL7L1, BOP1, PES1, RPF2, FTSJ3	1916	9	12023	3.48614	1	0.959821	54.0961
GOTERM_BP_DIRECT	GO:0061088~regulation of sequestering of zinc ion	5	0.00114649	0.0413369	SLC30A4, AP3D1, SLC30A5, SLC30A6, SLC30A7	1916	9	12023	3.48614	1	0.959821	54.0961
GOTERM_BP_DIRECT	GO:0030490~maturation of SSU-rRNA	6	0.00137579	0.0203117	NOP14, UTP4, NOB1, SNU13, TSR3, UTP14A	1916	11	12023	3.42276	1	0.866656	31.5102
GOTERM_BP_DIRECT	GO:0016226~iron-sulfur cluster assembly	6	0.00137579	0.0203117	ISCA1, CIAO1, NFU1, ISCA2, FAM96A, NUBP1	1916	11	12023	3.42276	1	0.866656	31.5102
GOTERM_BP_DIRECT	GO:0034389~lipid particle organization	6	0.00137579	0.0203117	RAB18, FITM2, RAB3GAP1, PPID, PTGFRN, TBC1D20	1916	11	12023	3.42276	1	0.866656	31.5102
GOTERM_BP_DIRECT	GO:0030279~negative regulation of ossification	6	0.00137579	0.0203117	MEF2C, BCL2, CHSY1, SMURF1, RBPJ, LRP4	1916	11	12023	3.42276	1	0.866656	31.5102
GOTERM_BP_DIRECT	GO:0006301~postreplication repair	6	0.00137579	0.0203117	UBE2N, LOC102150222, POLH, UBE2F, UBE2V1, HLTF	1916	11	12023	3.42276	1	0.866656	31.5102
GOTERM_BP_DIRECT	GO:0000460~maturation of 5.8S rRNA	6	0.00137579	0.0203117	WDR37, MAK16, RRP15, MPHOSPH6, RPF1, C1D	1916	11	12023	3.42276	1	0.866656	31.5102
GOTERM_BP_DIRECT	GO:0006360~transcription from RNA polymerase I promoter	7	0.00160509	0.010103	POLR2E, POLR2L, POLR2K, POLR1A, POLR1B, TWISTNB, GTF2H1	1916	13	12023	3.37887	1	0.729212	17.0794
GOTERM_BP_DIRECT	GO:0006493~protein O-linked glycosylation	7	0.00160509	0.010103	VEGFB, PGM3, POMGNT1, GALNT7, POMK, EOGT, POGLUT1	1916	13	12023	3.37887	1	0.729212	17.0794
GOTERM_BP_DIRECT	GO:0000470~maturation of LSU-rRNA	8	0.00183439	0.00507062	RSL1D1, MRPL1, WDR37, NOP2, MAK16, RRP15, SNU13, RPF1	1916	15	12023	3.34669	1	0.561605	8.94987
GOTERM_BP_DIRECT	GO:0006904~vesicle docking involved in exocytosis	10	0.00229298	0.00203536	VPS18, SCFD1, SCFD2, VPS45, STXBP3, VPS33B, VPS11, VPS33A, YKT6, EXOC6B	1916	20	12023	3.13753	0.9995	0.344473	3.6881
GOTERM_BP_DIRECT	GO:0042273~ribosomal large subunit biogenesis	9	0.00206369	0.00397462	ZNF622, EBNA1BP2, SDAD1, SURF6, NIP7, AAMP, RPL26L1, RRS1, NOC2L	1916	18	12023	3.13753	1	0.507157	7.08208
GOTERM_BP_DIRECT	GO:0006891~intra-Golgi vesicle-mediated transport	8	0.00183439	0.00778949	COPA, COPB2, COG6, VTI1B, GOSR2, COPE, VTI1A, COG2	1916	16	12023	3.13753	1	0.66061	13.4312
GOTERM_BP_DIRECT	GO:0071712~ER-associated misfolded protein catabolic process	6	0.00137579	0.0303365	POMT2, VCP, SDF2L1, TOR1A, RNF185, UGGT1	1916	12	12023	3.13753	1	0.917804	43.3448
GOTERM_BP_DIRECT	GO:0045116~protein neddylation	6	0.00137579	0.0303365	DCUN1D2, UBE2M, NEDD8, DCUN1D3, DCUN1D4, DCUN1D5	1916	12	12023	3.13753	1	0.917804	43.3448
GOTERM_BP_DIRECT	GO:0006446~regulation of translational initiation	10	0.00229298	0.00306356	EIF4G1, NCBP2, NCBP1, EIF3A, EIF3B, EIF5, EIF4A1, EIF5B, EIF3I, EIF3J	1916	21	12023	2.98812	0.999989	0.452564	5.50193
GOTERM_BP_DIRECT	GO:0006631~fatty acid metabolic process	8	0.00183439	0.0114484	SGPL1, ALKBH7, NDUFS6, PPARA, PRKAR2B, CRYL1, HADH, MECR	1916	17	12023	2.95297	1	0.761172	19.1336
GOTERM_BP_DIRECT	GO:0007040~lysosome organization	14	0.00321018	0.000335953	VPS18, MFSD8, LAMTOR1, HEXA, HPS4, HEXB, ACP2, ABCA1, GNPTAB, TPP1, GAA, VPS11, CLN5, CLN6	1916	30	12023	2.92836	0.714539	0.117825	0.617816
GOTERM_BP_DIRECT	GO:0001824~blastocyst development	7	0.00160509	0.0221729	N4BP2L2, PSMC4, EMG1, PSMC3, TGFBR1, DAD1, MED21	1916	15	12023	2.92836	1	0.876492	33.8706
GOTERM_BP_DIRECT	GO:0000462~maturation of SSU-rRNA from tricistronic rRNA transcript (SSU-rRNA, 5.8S rRNA, LSU-rRNA)	13	0.00298088	0.000641381	UTP3, TBL3, TSR1, TSR2, EMG1, UTP18, UTP6, MRPS11, DIEXF, FCF1, DCAF13, WDR3, UTP20	1916	28	12023	2.91342	0.908714	0.168177	1.17636
GOTERM_BP_DIRECT	GO:0006888~ER to Golgi vesicle-mediated transport	25	0.00573246	6.55876e-07	COPA, SEC24A, LMAN2L, LMF1, LMAN2, RAB1A, COPB2, STX18, SEC24D, SEC23IP, ZW10, SEC23A, VTI1B, YIF1B, YIF1A, VTI1A, BCAP31, HYOU1, CNIH4, GOSR2, TBC1D20, YKT6, SEC23B, COPE, TRAPPC2	1916	54	12023	2.90512	0.00244408	0.00122279	0.00120969
GOTERM_BP_DIRECT	GO:0034605~cellular response to heat	10	0.00229298	0.00446072	HTRA2, HSF1, HMOX1, CLPB, TFEC, NF1, HSPA6, ST8SIA1, HIKESHI, PDCD6	1916	22	12023	2.8523	1	0.531487	7.91492
GOTERM_BP_DIRECT	GO:0006364~rRNA processing	16	0.00366877	0.000201636	NOL6, TBL3, RRP7A, UTP15, RRP9, UTP11, MRTO4, DDX27, EBNA1BP2, DDX56, SBDS, WDR36, PIH1D1, MDN1, DDX52, GEMIN4	1916	36	12023	2.78891	0.528757	0.117853	0.371243
GOTERM_BP_DIRECT	GO:0006509~membrane protein ectodomain proteolysis	7	0.00160509	0.0308029	NCSTN, APH1A, BACE2, PSEN2, DAG1, SPPL2A, ADAM9	1916	16	12023	2.74534	1	0.916564	43.8453
GOTERM_BP_DIRECT	GO:0051603~proteolysis involved in cellular protein catabolic process	15	0.00343948	0.000540618	SCPEP1, IDE, CTSA, CTSS, PSMA7, CPVL, PSMB4, PSMB7, PSMB6, PSMB1, CTSO, CLPP, CTSC, CTSB, CTSH	1916	35	12023	2.68931	0.867025	0.154758	0.992425
GOTERM_BP_DIRECT	GO:0042254~ribosome biogenesis	9	0.00206369	0.0118568	NVL, MRPL10, GAR1, LSG1, DDX31, GNL3L, GNL2, GNL1, GNL3	1916	21	12023	2.68931	1	0.762017	19.7476
GOTERM_BP_DIRECT	GO:0070584~mitochondrion morphogenesis	8	0.00183439	0.0222047	MTM1, NDUFS6, OPA3, PANK2, SSBP1, BAX, POLDIP2, SLIRP	1916	19	12023	2.64213	1	0.870412	33.9102
GOTERM_BP_DIRECT	GO:0006491~N-glycan processing	8	0.00183439	0.0222047	MAN2A2, FUT8, EDEM3, MAN1A1, PRKCSH, EDEM2, EDEM1, MAN1C1	1916	19	12023	2.64213	1	0.870412	33.9102
GOTERM_BP_DIRECT	GO:0016050~vesicle organization	8	0.00183439	0.0222047	ALS2, SNX9, SNX5, SNX8, SNX2, SNX1, SNX30, SNX11	1916	19	12023	2.64213	1	0.870412	33.9102
GOTERM_BP_DIRECT	GO:0042147~retrograde transport, endosome to Golgi	17	0.00389807	0.000308296	VPS29, STX6, ARL1, RAB7A, RAB9A, SNX5, VTI1B, SNX1, DENND2A, VTI1A, RIC1, AP1S1, EVI5, VPS35, GOSR2, YKT6, RHOBTB3	1916	41	12023	2.60185	0.683499	0.119993	0.567092
GOTERM_BP_DIRECT	GO:0006487~protein N-linked glycosylation	7	0.00160509	0.0413599	PGM3, FUT8, DPM1, ALG5, MOGS, RPN2, ALG8	1916	17	12023	2.58385	1	0.95723	54.1164
GOTERM_BP_DIRECT	GO:0042542~response to hydrogen peroxide	7	0.00160509	0.0413599	BCL2, PPP2CB, APTX, PRDX3, KPNA4, SOD1, ADAM9	1916	17	12023	2.58385	1	0.95723	54.1164
GOTERM_BP_DIRECT	GO:0030433~ER-associated ubiquitin-dependent protein catabolic process	17	0.00389807	0.000425149	DERL2, CCDC47, ERLIN1, EDEM3, UBQLN1, EDEM2, EDEM1, TMEM67, STT3B, TMEM129, PSMC5, PSMC4, PSMC3, PSMC1, UBXN8, UBXN4, AUP1	1916	42	12023	2.5399	0.795374	0.134314	0.781241
GOTERM_BP_DIRECT	GO:0016197~endosomal transport	8	0.00183439	0.0295803	ALS2, SNX9, BLOC1S5, AP5S1, BLOC1S1, ABCA1, VPS16, RAB10	1916	20	12023	2.51002	1	0.917052	42.5244
GOTERM_BP_DIRECT	GO:0015031~protein transport	15	0.00343948	0.00140895	SCAMP1, KDELR2, TIMM10B, SCAMP3, RRBP1, LMAN2L, PPT1, TIMM13, VPS33B, TIMM8B, IST1, ARCN1, KDELR1, SEC61A2, COG2	1916	38	12023	2.47699	0.994807	0.295805	2.56696
GOTERM_BP_DIRECT	GO:0061077~chaperone-mediated protein folding	9	0.00206369	0.0212968	FKBP9, FKBP7, FKBP4, PPID, FKBP3, TOR1A, FKBP1A, CHORDC1, UNC45A	1916	23	12023	2.45546	1	0.87247	32.7693
GOTERM_BP_DIRECT	GO:0006890~retrograde vesicle-mediated transport, Golgi to ER	9	0.00206369	0.0212968	KIF1C, COPA, COPB2, COG7, STX18, ARF4, ARCN1, LMAN2, COPE	1916	23	12023	2.45546	1	0.87247	32.7693
GOTERM_BP_DIRECT	GO:1901998~toxin transport	12	0.00275158	0.00624165	CCT7, MTMR12, COPB2, TCP1, CCT5, SCFD1, CCT4, NRP1, ATP6V0A1, CCT2, CCT3, VPS11	1916	31	12023	2.42905	1	0.607188	10.9063
GOTERM_BP_DIRECT	GO:0008630~intrinsic apoptotic signaling pathway in response to DNA damage	12	0.00275158	0.00816801	MSH6, TNFRSF1B, ERCC6, HTRA2, CASP9, BAX, BCL2, BCL2L2, BAD, ATM, PIK3R1, FNIP2	1916	32	12023	2.35314	1	0.664743	14.0383
GOTERM_BP_DIRECT	GO:0032212~positive regulation of telomere maintenance via telomerase	10	0.00229298	0.0199297	CCT7, TCP1, CCT5, CCT4, WRAP53, PKIB, CCT2, CCT3, ATM, NEK7	1916	27	12023	2.32409	1	0.86866	31.0159
GOTERM_BP_DIRECT	GO:0006457~protein folding	33	0.00756685	4.066e-06	HSP90AB1, TMX1, GRPEL1, TXN2, PDIA6, PDIA5, CCT3, PDIA4, CALR, CANX, CDC37, NUDCD2, MKKS, PPIL3, PPIL6, QSOX2, NUDC, DNAJA3, TXNL1, P4HB, TCP1, HSP90AA1, ERP29, AARS, CCT7, PFDN1, CCT5, PDCL3, CCT4, LOC100054282, PFDN6, PFDN4, LOC100054696	1916	90	12023	2.30085	0.0150558	0.005044	0.00749903
GOTERM_BP_DIRECT	GO:0046034~ATP metabolic process	8	0.00183439	0.0488762	ATP6V1A, ATP1B1, SLC25A25, VCP, OLA1, BAD, CTNS, HSPA8	1916	22	12023	2.28184	1	0.972552	60.3169
GOTERM_BP_DIRECT	GO:0006886~intracellular protein transport	59	0.0135286	9.56274e-10	COPA, CLTA, SEC24A, CLTB, AP1B1, AP1G1, AP2S1, CLTC, KIF13A, COPB2, TBC1D15, AP1S1, TBC1D12, EVI5, COPB1, ANKRD50, TLK1, VPS16, VPS11, SAR1B, SEC24D, TBC1D9B, SEC23A, STX6, RAMP2, STX4, ERP29, WLS, TBC1D22A, BCAP31, SEC23B, SNX11, VPS29, SNX9, STX8, RABGAP1, TBC1D9, SNX5, STAM2, SNX8, SNX17, SNX2, SNX1, DSCR3, STX12, STX18, AP3D1, VPS35, AP2M1, XPOT, ASPSCR1, VPS18, ARFIP1, USP6NL, AP2A2, COG7, A…	1916	165	12023	2.24381	3.56785e-06	3.56785e-06	1.76374e-06
GOTERM_BP_DIRECT	GO:0031647~regulation of protein stability	15	0.00343948	0.00524277	TADA2A, DPH6, APTX, GNL3L, SUGT1, QRSL1, ASGR2, HDAC3, BCL2, VPS35, DPM3, HDAC8, PSMD8, HSPA8, PINX1	1916	43	12023	2.18897	1	0.558323	9.24001
GOTERM_BP_DIRECT	GO:0006887~exocytosis	11	0.00252228	0.0418838	MYO5A, SCAMP1, STXBP6, VAMP5, PDZD11, EXOC5, CDK16, TNFAIP2, YKT6, LOC100065466, EXOC1	1916	35	12023	1.97216	1	0.956287	54.5767
GOTERM_BP_DIRECT	GO:0034976~response to endoplasmic reticulum stress	11	0.00252228	0.0418838	TMX1, P4HB, HYOU1, TMEM33, EIF2S1, PPP2CB, PDIA6, PDIA5, PDIA4, PIK3R1, EIF2B5	1916	35	12023	1.97216	1	0.956287	54.5767
GOTERM_BP_DIRECT	GO:0045454~cell redox homeostasis	17	0.00389807	0.0140644	GLRX3, TXNL1, P4HB, TMX1, AIFM1, TXN2, PDIA6, PDIA5, TXNDC9, PDIA4, PRDX3, PRDX1, GSR, NNT, LOC100071709, TXNRD1, LOC100056712	1916	57	12023	1.87151	1	0.80823	22.9907
GOTERM_BP_DIRECT	GO:0000724~double-strand break repair via homologous recombination	15	0.00343948	0.0251743	MORF4L1, LOC102150222, NBN, BLM, AP5S1, SMC6, ATM, RAD50, RBBP8, RPA1, UBE2N, PSMD14, NABP2, ZFYVE26, NSMCE2	1916	51	12023	1.8456	1	0.896164	37.5158
GOTERM_BP_DIRECT	GO:0016192~vesicle-mediated transport	18	0.00412737	0.014694	CLTA, AP1B1, AP2S1, KIF16B, ARFGEF2, CLTC, SFT2D1, AP1S3, AP2A2, AP2A1, COPB1, AP3D1, JAGN1, RAB10, TRIP10, SAR1B, GGA2, AP2M1	1916	62	12023	1.82179	1	0.802973	23.8927
GOTERM_BP_DIRECT	GO:0050821~protein stabilization	28	0.00642035	0.00198758	ATP1B1, ATP1B3, HPS4, NAA15, CCT2, CCT3, CALR, CDC37, PIN1, STX12, AAK1, TNIP2, PIK3R1, DVL3, TCP1, PHB, CRTAP, IGF1, MUL1, STXBP4, CCT7, LAMP1, LAMP2, CCT5, CCT4, COG7, PHB2, HSPD1	1916	97	12023	1.81136	0.999403	0.353802	3.60301
GOTERM_BP_DIRECT	GO:0006511~ubiquitin-dependent protein catabolic process	24	0.00550316	0.026104	LOC102150222, USP40, USP8, USP5, COPS3, BAP1, PSMA2, UBE2N, PSMA1, UHRF2, PSMD13, PSMA6, SQSTM1, PSMD11, PSMA4, PSMA3, UCHL5, PSMD3, USP36, USP10, UCHL3, RNF168, USP24, LOC100050355	1916	96	12023	1.56876	1	0.899245	38.6059
GOTERM_BP_DIRECT	GO:0006412~translation	37	0.00848404	0.0194369	MRPS14, MRPS12, MRPS11, EIF5B, LOC100058071, MRPL11, MRPL13, SLC25A25, MRPL17, MRPL19, MRPL18, MRPL37, SLC25A44, SLC25A26, GUF1, MRPL32, MRPL34, MRPL35, MRPL1, MRPL4, MRPL51, MRPL3, MRPS23, RRBP1, MRPS5, MRPS7, MRPL30, MRPL24, SLC25A11, SLC25A32, SLC25A13, MRPS18B, MRPL27, SLC25A35, SLC25A19, EEFSEC, SLC25A51	1916	161	12023	1.44209	1	0.869222	30.3734

## Sheet: Brown Module 
Category	Term	Count	%	PValue	Genes	List Total	Pop Hits	Pop Total	Fold Enrichment	Bonferroni	Benjamini	FDR
GOTERM_BP_DIRECT	GO:0002504~antigen processing and presentation of peptide or polysaccharide antigen via MHC class II	10	1.08342	6.93e-11	LOC100060996, DRA, DQB, DRB, DQA, LOC100061035	583	11	12023	18.7479	1.32e-07	1.32e-07	1.32e-07
GOTERM_BP_DIRECT	GO:1900028~negative regulation of ruffle assembly	3	0.325027	0.0131499	KANK1, EVL, PFN2	583	4	12023	15.467	1	1	1
GOTERM_BP_DIRECT	GO:1903361~protein localization to basolateral plasma membrane	3	0.325027	0.0131499	LIN7A, LIN7C, LIN7B	583	4	12023	15.467	1	1	1
GOTERM_BP_DIRECT	GO:0003374~dynamin polymerization involved in mitochondrial fission	3	0.325027	0.0212173	DNM3, OPA1, DNM1L	583	5	12023	12.3736	1	1	1
GOTERM_BP_DIRECT	GO:0009249~protein lipoylation	3	0.325027	0.0212173	LIPT1, NDUFAB1, LIAS	583	5	12023	12.3736	1	1	1
GOTERM_BP_DIRECT	GO:2000144~positive regulation of DNA-templated transcription, initiation	3	0.325027	0.0212173	FOSL1, CTNNB1, MITF	583	5	12023	12.3736	1	1	1
GOTERM_BP_DIRECT	GO:0030001~metal ion transport	3	0.325027	0.0308149	NDFIP2, NDFIP1, ATP7A	583	6	12023	10.3113	1	1	1
GOTERM_BP_DIRECT	GO:0006002~fructose 6-phosphate metabolic process	3	0.325027	0.0308149	GFPT1, PFKM, FBP2	583	6	12023	10.3113	1	1	1
GOTERM_BP_DIRECT	GO:0022904~respiratory electron transport chain	5	0.541712	0.00136524	ALDH5A1, NDUFA5, SDHA, PPARGC1A, SDHB	583	11	12023	9.37393	0.92551	0.865108	0.865108
GOTERM_BP_DIRECT	GO:0090005~negative regulation of establishment of protein localization to plasma membrane	3	0.325027	0.0417761	LRRC15, TMBIM1, BCL2L1	583	7	12023	8.83827	1	1	1
GOTERM_BP_DIRECT	GO:0045199~maintenance of epithelial cell apical/basal polarity	3	0.325027	0.0417761	LIN7A, LIN7C, LIN7B	583	7	12023	8.83827	1	1	1
GOTERM_BP_DIRECT	GO:0006108~malate metabolic process	3	0.325027	0.0417761	MDH1, MDH2, ME1	583	7	12023	8.83827	1	1	1
GOTERM_BP_DIRECT	GO:0006120~mitochondrial electron transport, NADH to ubiquinone	4	0.433369	0.0104896	NDUFB8, NDUFA10, COQ9, DLD	583	10	12023	8.24906	1	1	1
GOTERM_BP_DIRECT	GO:0032801~receptor catabolic process	4	0.433369	0.0139113	CDK5, SNX25, CAPN1, LGMN	583	11	12023	7.49914	1	1	1
GOTERM_BP_DIRECT	GO:0000266~mitochondrial fission	5	0.541712	0.00368725	DNM3, OPA1, MTFR1, DNM1L, COX10	583	14	12023	7.36523	0.999108	1	1
GOTERM_BP_DIRECT	GO:0006099~tricarboxylic acid cycle	7	0.758397	0.000364	MDH1, MDH2, DLST, ACO2, SDHA, SDHB, IDH3A	583	21	12023	6.87421	0.499914	0.346424	0.346424
GOTERM_BP_DIRECT	GO:0008637~apoptotic mitochondrial changes	4	0.433369	0.0178917	NDUFS1, DNM1L, GCLM, SLC25A4	583	12	12023	6.87421	1	1	1
GOTERM_BP_DIRECT	GO:0090201~negative regulation of release of cytochrome c from mitochondria	4	0.433369	0.0275518	OPA1, LMNA, TRIAP1, HIGD1A	583	14	12023	5.89218	1	1	1
GOTERM_BP_DIRECT	GO:0016601~Rac protein signal transduction	4	0.433369	0.0332302	EPS8, NISCH, NCKAP1, ELMO1	583	15	12023	5.49937	1	1	1
GOTERM_BP_DIRECT	GO:0002224~toll-like receptor signaling pathway	4	0.433369	0.0332302	TLR1, RPS6KA3, TLR8, TLR6	583	15	12023	5.49937	1	1	1
GOTERM_BP_DIRECT	GO:0048008~platelet-derived growth factor receptor signaling pathway	5	0.541712	0.0168553	MYO1E, PLEKHA1, ITGB3, ZFAND5, BCAR1	583	21	12023	4.91015	1	1	1
GOTERM_BP_DIRECT	GO:0090200~positive regulation of release of cytochrome c from mitochondria	4	0.433369	0.0462498	MLLT11, DNM1L, BID, TP53	583	17	12023	4.85239	1	1	1
GOTERM_BP_DIRECT	GO:0061025~membrane fusion	4	0.433369	0.0462498	DNM3, DCSTAMP, STX3, DNM1L	583	17	12023	4.85239	1	1	1
GOTERM_BP_DIRECT	GO:0034097~response to cytokine	5	0.541712	0.0267022	PPP3CB, ALDH1A2, TIMP2, NFKB1, BCL2L1	583	24	12023	4.29638	1	1	1
GOTERM_BP_DIRECT	GO:0051017~actin filament bundle assembly	5	0.541712	0.0267022	EPS8, MYO1B, BAIAP2L1, PLS3, RHOD	583	24	12023	4.29638	1	1	1
GOTERM_BP_DIRECT	GO:0051289~protein homotetramerization	6	0.650054	0.0284665	ALDH5A1, SYT11, CTH, EVL, DNM1L, DECR1	583	36	12023	3.43711	1	1	1
GOTERM_BP_DIRECT	GO:0030334~regulation of cell migration	7	0.758397	0.0273697	CDK5, ITGB3, LMNA, ENPP2, NEXN, PLXNC1, PHLDA2	583	48	12023	3.00747	1	1	1
GOTERM_BP_DIRECT	GO:0016337~single organismal cell-cell adhesion	7	0.758397	0.0452988	KIRREL2, SHC1, FBLIM1, PDPN, PKP1, CTNNB1, NECTIN1	583	54	12023	2.67331	1	1	1

## Sheet: Black Module 
Category	Term	Count	%	PValue	Genes	List Total	Pop Hits	Pop Total	Fold Enrichment	Bonferroni	Benjamini	FDR
GOTERM_BP_DIRECT	GO:0033159~negative regulation of protein import into nucleus, translocation	2	2.29885	0.00945974	PDE2A, GAS6	58	2	12023	207.293	0.945956	1	1
GOTERM_BP_DIRECT	GO:0030818~negative regulation of cAMP biosynthetic process	2	2.29885	0.0281162	APLP1, PDE2A	58	6	12023	69.0977	0.999842	1	1
GOTERM_BP_DIRECT	GO:0086005~ventricular cardiac muscle cell action potential	2	2.29885	0.0327262	PKP2, SNTA1	58	7	12023	59.2266	0.999963	1	1
GOTERM_BP_DIRECT	GO:0010628~positive regulation of gene expression	4	4.5977	0.021359	CDH3, LRRC32, GAS6, STOX1	58	125	12023	6.63338	0.998678	1	1

## Sheet: Pink Module 
Category	Term	Count	%	PValue	Genes	List Total	Pop Hits	Pop Total	Fold Enrichment	Bonferroni	Benjamini	FDR
GOTERM_BP_DIRECT	GO:0006096~glycolytic process	7	7.52688	4.95785e-10	TPI1, PGK1, ALDOC, ENO1, ENO2, GAPDH, HK1	59	21	12023	67.9266	1.67575e-07	1.67575e-07	1.67575e-07
GOTERM_BP_DIRECT	GO:0030388~fructose 1,6-bisphosphate metabolic process	2	2.15054	0.0286036	PFKL, ALDOC	59	6	12023	67.9266	0.999945	1	1
GOTERM_BP_DIRECT	GO:0030949~positive regulation of vascular endothelial growth factor receptor signaling pathway	2	2.15054	0.0379582	FLT1, VEGFA	59	8	12023	50.9449	0.999998	1	1
GOTERM_BP_DIRECT	GO:0009142~nucleoside triphosphate biosynthetic process	2	2.15054	0.0426023	AK1, AK4	59	9	12023	45.2844	1	1	1
GOTERM_BP_DIRECT	GO:0072593~reactive oxygen species metabolic process	3	3.22581	0.00638965	PRDX4, BNIP3, DDIT4	59	25	12023	24.4536	0.885437	1	1
GOTERM_BP_DIRECT	GO:0043406~positive regulation of MAP kinase activity	3	3.22581	0.00972237	FLT1, MIF, VEGFA	59	31	12023	19.7206	0.963199	1	1
GOTERM_BP_DIRECT	GO:0001666~response to hypoxia	3	3.22581	0.0391881	ALKBH5, DDIT4, VEGFA	59	65	12023	9.40522	0.999999	1	1

## Sheet: Turquoise Module 
Category	Term	Count	%	PValue	Genes	List Total	Pop Hits	Pop Total	Fold Enrichment	Bonferroni	Benjamini	FDR
GOTERM_BP_DIRECT	GO:0035970~peptidyl-threonine dephosphorylation	6	0.126529	0.0038478	PPM1A, PPM1B, PPM1D, PPM1E, PPM1F, PPM1G	2892	6	12023	4.15733	1	0.73863	0.737298
GOTERM_BP_DIRECT	GO:1902715~positive regulation of interferon-gamma secretion	5	0.105441	0.0134819	CD2, ABL1, RASGRP1, CD244, SLAMF1	2892	5	12023	4.15733	1	1	0.998397
GOTERM_BP_DIRECT	GO:1903608~protein localization to cytoplasmic stress granule	5	0.105441	0.0134819	TIA1, DDX3X, SSB, DDX1, DCP1A	2892	5	12023	4.15733	1	1	0.998397
GOTERM_BP_DIRECT	GO:0045637~regulation of myeloid cell differentiation	4	0.0843526	0.0455545	RARG, CSF3R, FAS, RNF41	2892	4	12023	4.15733	1	1	0.998397
GOTERM_BP_DIRECT	GO:0030242~pexophagy	4	0.0843526	0.0455545	ACBD5, RB1CC1, PIK3R4, TRAPPC8	2892	4	12023	4.15733	1	1	0.998397
GOTERM_BP_DIRECT	GO:0090315~negative regulation of protein targeting to membrane	4	0.0843526	0.0455545	DMTN, GDI1, INPP5K, ITGB1BP1	2892	4	12023	4.15733	1	1	0.998397
GOTERM_BP_DIRECT	GO:0000972~transcription-dependent tethering of RNA polymerase II gene DNA at nuclear periphery	4	0.0843526	0.0455545	NUP133, NUP155, LDB1, RAE1	2892	4	12023	4.15733	1	1	0.998397
GOTERM_BP_DIRECT	GO:0043983~histone H4-K12 acetylation	4	0.0843526	0.0455545	ING4, MEAF6, JADE3, KAT7	2892	4	12023	4.15733	1	1	0.998397
GOTERM_BP_DIRECT	GO:2001168~positive regulation of histone H2B ubiquitination	4	0.0843526	0.0455545	CDK9, RNF20, CTR9, RNF40	2892	4	12023	4.15733	1	1	0.998397
GOTERM_BP_DIRECT	GO:0006344~maintenance of chromatin silencing	4	0.0843526	0.0455545	HDAC2, UBE2B, ARID1A, SIRT1	2892	4	12023	4.15733	1	1	0.998397
GOTERM_BP_DIRECT	GO:0031062~positive regulation of histone methylation	4	0.0843526	0.0455545	RNF20, CHTOP, PAF1, PAXBP1	2892	4	12023	4.15733	1	1	0.998397
GOTERM_BP_DIRECT	GO:0034145~positive regulation of toll-like receptor 4 signaling pathway	6	0.126529	0.0107914	WDFY1, PELI1, F2RL1, PTPN22, TIRAP, LTF	2892	7	12023	3.56343	1	1	0.998397
GOTERM_BP_DIRECT	GO:0043405~regulation of MAP kinase activity	5	0.105441	0.03275	TSG101, HGS, CDK12, TRIB1, TRIB2	2892	6	12023	3.46444	1	1	0.998397
GOTERM_BP_DIRECT	GO:0034975~protein folding in endoplasmic reticulum	5	0.105441	0.03275	ERO1A, ERO1B, DNAJC10, EMC3, EMC6	2892	6	12023	3.46444	1	1	0.998397
GOTERM_BP_DIRECT	GO:0031274~positive regulation of pseudopodium assembly	5	0.105441	0.03275	CDC42, CDC42EP4, CDC42EP3, CDC42EP1, F2RL1	2892	6	12023	3.46444	1	1	0.998397
GOTERM_BP_DIRECT	GO:0016973~poly(A)+ mRNA export from nucleus	7	0.147617	0.00813626	GLE1, NXF1, HHEX, ENY2, POLDIP3, ZC3H3, THOC2	2892	9	12023	3.23348	1	1	0.998397
GOTERM_BP_DIRECT	GO:0060216~definitive hemopoiesis	6	0.126529	0.0231017	HOXA9, KMT2A, CBFB, SP3, ADAR, GATA2	2892	8	12023	3.118	1	1	0.998397
GOTERM_BP_DIRECT	GO:0071353~cellular response to interleukin-4	12	0.253058	0.000431159	ALAD, XBP1, RPL3, HSPA5, IMPDH2, TCF7, LEF1, XCL1, KEAP1, GATA3, CORO1A, MCM2	2892	17	12023	2.93459	0.883792	0.209425	0.209048
GOTERM_BP_DIRECT	GO:0016578~histone deubiquitination	7	0.147617	0.016225	ENY2, TRRAP, ATXN7, USP22, USP3, USP34, ATXN7L3	2892	10	12023	2.91013	1	1	0.998397
GOTERM_BP_DIRECT	GO:0043922~negative regulation by host of viral transcription	7	0.147617	0.016225	REST, TFAP4, ZNF639, HDAC1, CCL5, INPP5K, TARDBP	2892	10	12023	2.91013	1	1	0.998397
GOTERM_BP_DIRECT	GO:0048821~erythrocyte development	8	0.168705	0.011394	MED1, DMTN, BCL6, SRF, TMOD3, ARID4A, SOX6, JMJD6	2892	12	12023	2.77155	1	1	0.998397
GOTERM_BP_DIRECT	GO:0006349~regulation of gene expression by genetic imprinting	8	0.168705	0.011394	MECP2, GSK3B, ZFP57, KDM1B, DNMT3A, ARID4A, ARID4B, CTCF	2892	12	12023	2.77155	1	1	0.998397
GOTERM_BP_DIRECT	GO:0006376~mRNA splice site selection	6	0.126529	0.0418084	YTHDC1, CELF1, CELF2, LUC7L3, LUC7L, SRSF6	2892	9	12023	2.77155	1	1	0.998397
GOTERM_BP_DIRECT	GO:0035162~embryonic hemopoiesis	6	0.126529	0.0418084	MED1, KMT2A, KIT, GATA3, HIF1A, TGFBR2	2892	9	12023	2.77155	1	1	0.998397
GOTERM_BP_DIRECT	GO:0033628~regulation of cell adhesion mediated by integrin	6	0.126529	0.0418084	EFNA1, LYN, TESC, ITGB1BP1, PTK2, EPHA2	2892	9	12023	2.77155	1	1	0.998397
GOTERM_BP_DIRECT	GO:0051569~regulation of histone H3-K4 methylation	6	0.126529	0.0418084	GFI1B, GFI1, CTR9, KMT2B, GATA3, ZNF335	2892	9	12023	2.77155	1	1	0.998397
GOTERM_BP_DIRECT	GO:0051279~regulation of release of sequestered calcium ion into cytosol	6	0.126529	0.0418084	LYN, DIAPH1, PTK2B, PTPN6, PRKD1, CORO1A	2892	9	12023	2.77155	1	1	0.998397
GOTERM_BP_DIRECT	GO:0022604~regulation of cell morphogenesis	11	0.23197	0.0022519	STRIP1, ZRANB1, SPARC, FMNL2, ZMYM2, ZMYM4, ZMYM6, QRICH1, PDZD8, CAMSAP1, ZNF135	2892	17	12023	2.69004	0.999987	0.488661	0.48778
GOTERM_BP_DIRECT	GO:0051571~positive regulation of histone H3-K4 methylation	9	0.189793	0.00801163	SMAD4, PAXIP1, SNW1, KMT2A, CTR9, MYB, DNMT3B, RTF1, OGT	2892	14	12023	2.67257	1	1	0.998397
GOTERM_BP_DIRECT	GO:0043484~regulation of RNA splicing	14	0.295234	0.000461567	RBM38, RBFOX2, CELF1, AKAP17A, CLK4, CLK3, CLK2, AFF2, CLK1, SON, ESRP2, HNRNPH1, HNRNPF, AGGF1	2892	22	12023	2.64557	0.900163	0.209425	0.209048
GOTERM_BP_DIRECT	GO:0080182~histone H3-K4 trimethylation	7	0.147617	0.0285173	KMT2A, CTR9, KMT2B, ARID4A, RTF1, ZNF335, OGT	2892	11	12023	2.64557	1	1	0.998397
GOTERM_BP_DIRECT	GO:0006914~autophagy	13	0.274146	0.00115736	SRPX, ATG3, UVRAG, HMGB1, AMBRA1, ATG13, VPS51, SESN2, ANXA7, NRBF2, OPTN, VPS39, C23H9ORF72	2892	21	12023	2.57359	0.99691	0.339458	0.338846
GOTERM_BP_DIRECT	GO:0030099~myeloid cell differentiation	8	0.168705	0.0312282	CBFB, BCL6, NCOA6, GFI1, KAT6A, CLEC5A, KAT8, PRKX	2892	14	12023	2.37562	1	1	0.998397
GOTERM_BP_DIRECT	GO:0009967~positive regulation of signal transduction	8	0.168705	0.0312282	KHDRBS1, HSH2D, SH2D1A, GRB2, CDKN2AIP, HDAC6, LAT, MAPK8IP1	2892	14	12023	2.37562	1	1	0.998397
GOTERM_BP_DIRECT	GO:0043966~histone H3 acetylation	17	0.358499	0.000507066	BRD1, BRPF1, SPI1, BRPF3, LEF1, JADE3, TAF5L, ING4, ING5, KAT6B, IRF4, KAT6A, SAP130, WDR5, TADA1, KAT7, MAP3K7	2892	30	12023	2.35582	0.920453	0.210897	0.210517
GOTERM_BP_DIRECT	GO:0050853~B cell receptor signaling pathway	14	0.295234	0.00359693	BLK, LYN, SYK, PRKCB, NFAM1, NFATC2, LAT2, CD79A, TEC, LCK, CD19, ABL1, CD38, PTPN6	2892	26	12023	2.23856	1	0.71809	0.716795
GOTERM_BP_DIRECT	GO:0018107~peptidyl-threonine phosphorylation	15	0.316322	0.00253741	GSK3B, CAMK2D, PDPK1, TNKS, PRKCD, STK39, DYRK1A, LMTK2, OXSR1, NLK, TGFBR2, CLK1, GRK2, CDK5R1, MAP3K12	2892	28	12023	2.22714	0.999997	0.527675	0.526724
GOTERM_BP_DIRECT	GO:0030970~retrograde protein transport, ER to cytosol	8	0.168705	0.0466641	ERLEC1, NPLOC4, OS9, SEL1L, SYVN1, DERL1, HSP90B1, HERPUD1	2892	15	12023	2.21724	1	1	0.998397
GOTERM_BP_DIRECT	GO:0045638~negative regulation of myeloid cell differentiation	9	0.189793	0.0322633	NFKBIA, HOXA9, RBM15, CDK6, ZBTB16, CTR9, GPR171, PTK2B, PAF1	2892	17	12023	2.20094	1	1	0.998397
GOTERM_BP_DIRECT	GO:0001782~B cell homeostasis	9	0.189793	0.0322633	LYN, TNFRSF13B, PPP2R3C, RC3H1, TNFRSF13C, SOS1, RC3H2, GAPT, TNFSF13B	2892	17	12023	2.20094	1	1	0.998397
GOTERM_BP_DIRECT	GO:0030866~cortical actin cytoskeleton organization	10	0.210881	0.022425	IKBKB, STRIP1, FMNL1, FMNL2, ROCK1, ROCK2, EPB41, TLN1, LLGL1, LLGL2	2892	19	12023	2.18807	1	1	0.998397
GOTERM_BP_DIRECT	GO:0007265~Ras protein signal transduction	14	0.295234	0.00542797	RB1, BRAP, CDKN1A, RALB, SETDB1, RRAS2, USP28, RASGRP1, RIT1, TRIM28, MAPKAPK5, PRKD1, HRAS, LAT	2892	27	12023	2.15565	1	0.934172	0.932488
GOTERM_BP_DIRECT	GO:0038083~peptidyl-tyrosine autophosphorylation	19	0.400675	0.00142996	BLK, LYN, ITK, SYK, TNK2, TXK, TYK2, BMX, PTK2, FGR, TEC, LCK, ABL1, PTK2B, CSK, JAK2, JAK3, MAPK3, JAK1	2892	38	12023	2.07867	0.999209	0.356848	0.356204
GOTERM_BP_DIRECT	GO:0042149~cellular response to glucose starvation	12	0.253058	0.0159211	IMPACT, PRKAA1, XBP1, TBL2, NUAK2, MTMR3, HSPA5, PIK3R4, BHLHA15, ATG14, RRP8, ATF4	2892	24	12023	2.07867	1	1	0.998397
GOTERM_BP_DIRECT	GO:0070059~intrinsic apoptotic signaling pathway in response to endoplasmic reticulum stress	10	0.210881	0.0322573	ERN1, ERO1A, BAG6, GSK3B, XBP1, APAF1, DNAJC10, ATP2A1, CHAC1, ATF4	2892	20	12023	2.07867	1	1	0.998397
GOTERM_BP_DIRECT	GO:0030010~establishment of cell polarity	9	0.189793	0.0461266	BRSK1, WEE1, STK11, RAB11FIP2, PKD1, MARK3, MARK2, SDCCAG8, JAM3	2892	18	12023	2.07867	1	1	0.998397
GOTERM_BP_DIRECT	GO:0042787~protein ubiquitination involved in ubiquitin-dependent protein catabolic process	56	1.18094	9.89245e-09	UBE3C, KEAP1, RNF19B, UBE3A, UBE3B, HERC3, RNF115, MAEA, HERC2, RNF19A, ARIH2, ARIH1, RBX1, RNF144A, RNF126, GAN, HECW1, CACUL1, RNF122, CUL5, KLHL15, UBA6, CUL3, UBR4, NEDD4L, KLHL11, RNF7, RCHY1, CBL, RMND5B, RMND5A, OS9, HECTD4, BTBD3, BTBD2, RFFL, ANKIB1, HACE1, RNF24, SMURF2, SIAH2, AMFR, KLHL28, SIAH1, HUWE1, SYVN1, BTBD11, WWP2, BFAR, FBXL14, ABTB1, ITCH, LNX1, TRIP12, STUB1, CUL4B	2892	113	12023	2.06027	4.9372e-05	4.93732e-05	4.92842e-05
GOTERM_BP_DIRECT	GO:0006397~mRNA processing	15	0.316322	0.00800816	RBM39, RNASEL, RBM25, RBFOX2, RBM26, AKAP8L, USB1, CASC3, HNRNPLL, PTBP3, SRRM1, PAN2, PAN3, SON, AGGF1	2892	31	12023	2.01161	1	1	0.998397
GOTERM_BP_DIRECT	GO:0030218~erythrocyte differentiation	14	0.295234	0.0155856	LYN, DYRK3, SPI1, THRA, ADAR, IKZF1, GATA3, ETV2, ADD1, RPS14, KIT, FLVCR1, ACIN1, JAK2	2892	30	12023	1.94009	1	1	0.998397
GOTERM_BP_DIRECT	GO:0007010~cytoskeleton organization	26	0.548292	0.000565972	BLK, SH3KBP1, AVIL, MAST2, MAST1, THY1, CAMSAP1, TSPAN32, ABLIM1, MAEA, ZMYM2, PSTPIP2, ZMYM4, DPYSL2, ZMYM6, PTK2B, PDZD8, ZRANB1, PTK2, RP2, GAN, PHIP, QRICH1, BRWD1, BRWD3, ZNF135	2892	56	12023	1.93019	0.940725	0.21729	0.216898
GOTERM_BP_DIRECT	GO:0071407~cellular response to organic cyclic compound	13	0.274146	0.0218161	P2RY13, PLA2G4F, RGS19, TMF1, CDKN1B, TIPARP, AXIN1, CCL5, P2RY1, ALPL, PAK2, RAE1, PAK4	2892	28	12023	1.93019	1	1	0.998397
GOTERM_BP_DIRECT	GO:0006513~protein monoubiquitination	11	0.23197	0.042806	RNF126, UBE2B, CUL3, UBE2T, NEURL1, HUWE1, UBE2O, UBE4B, PEX12, TOPORS, RBX1	2892	24	12023	1.90544	1	1	0.998397
GOTERM_BP_DIRECT	GO:0043124~negative regulation of I-kappaB kinase/NF-kappaB signaling	11	0.23197	0.042806	NLRP12, CASP8, NLRX1, ABL1, RHOH, NLRC3, RIPK1, ASH1L, NFKBID, SIRT1, OPTN	2892	24	12023	1.90544	1	1	0.998397
GOTERM_BP_DIRECT	GO:0000045~autophagosome assembly	16	0.33741	0.0108968	ATG3, ATG9B, ATG9A, TRAPPC8, PSEN1, ATG14, ATG13, MAP1LC3B, ATG16L1, ATG101, RB1CC1, RAB23, ATG2A, ATG4A, EMC6, ATG2B	2892	35	12023	1.90049	1	1	0.998397
GOTERM_BP_DIRECT	GO:0050852~T cell receptor signaling pathway	16	0.33741	0.0108968	ITK, PDE4D, THEMIS, PTPN22, PSEN1, THY1, GATA3, BCL10, CD3E, SPPL3, STK11, PTPRC, THEMIS2, LCP2, RBCK1, HRAS	2892	35	12023	1.90049	1	1	0.998397
GOTERM_BP_DIRECT	GO:0000398~mRNA splicing, via spliceosome	33	0.695909	0.00015474	DBR1, SF3B2, SF3B3, DHX8, WDR83, U2AF1L4, UBL5, SART1, RAVER1, U2AF2, TRA2B, CWC22, TRA2A, DHX15, DHX38, BCAS2, SPEN, ZRSR2, RBM15, USP49, NONO, PRPF40B, LSM5, LSM3, CDC40, LSM2, SNW1, DDX39B, PSPC1, PRPF31, SNRNP200, SF1, SNRPB	2892	73	12023	1.87934	0.538082	0.0974381	0.0972624
GOTERM_BP_DIRECT	GO:0050727~regulation of inflammatory response	18	0.379587	0.00764367	LYN, ANXA1, IL1R1, LOC100061663, STK39, RELA, BCL6, CASP4, CASP1, DROSHA, TBC1D23, JAK2, S100A9, MYD88, BIRC2, S100A8, MCPH1, BRD4	2892	40	12023	1.8708	1	1	0.998397
GOTERM_BP_DIRECT	GO:0042384~cilium assembly	41	0.864614	3.09449e-05	TTC26, ARL6, TRAF3IP1, CEP295NL, IFT172, FBF1, CEP164, SNX10, CDC14A, DYNC2LI1, IFT74, ABLIM1, ABLIM3, RAB23, BBS9, POC1B, E2F4, IFT57, SNAP29, BBS5, IQCB1, IFT140, RFX2, RFX3, IFT122, IFT80, OCRL, KIF27, EHD1, ICK, AHI1, EHD3, TMEM237, ALMS1, ATXN10, B9D2, DZIP1, IFT46, CFAP53, CLUAP1, SSX2IP	2892	92	12023	1.85272	0.143112	0.051482	0.0513892
GOTERM_BP_DIRECT	GO:0009411~response to UV	12	0.253058	0.040649	CDKN2D, BRSK1, PRKAA1, UBE2B, SPRTN, USP1, REV1, UBE4B, UBE2A, TROVE2, USF1, MEN1	2892	27	12023	1.8477	1	1	0.998397
GOTERM_BP_DIRECT	GO:0042102~positive regulation of T cell proliferation	19	0.400675	0.00976497	SASH3, ANXA1, VCAM1, TNFRSF13C, BTNL2, CORO1A, TNFSF13B, SPTA1, CCDC88B, SPN, EFNB1, CD40LG, CD6, TNFSF4, CCL5, HES1, IL6ST, JAK3, HAVCR2	2892	44	12023	1.79521	1	1	0.998397
GOTERM_BP_DIRECT	GO:0070936~protein K48-linked ubiquitination	19	0.400675	0.00976497	HACE1, UBE2D4, UBE2B, UBE2D2, AMFR, SYVN1, RNF8, NEDD4L, BFAR, UBE3A, UBE2A, TOPORS, ITCH, RNF115, RNF126, UBE2T, ARIH2, PELI1, RFFL	2892	44	12023	1.79521	1	1	0.998397
GOTERM_BP_DIRECT	GO:0000209~protein polyubiquitination	32	0.674821	0.000678484	CBFB, UBE3C, TNKS, CUL3, RNF19B, HDAC6, RNF115, RNF114, RNF19A, ARIH2, ARIH1, SKP2, RNF20, ANKIB1, RNF24, UBE2B, AMFR, HUWE1, SYVN1, UBE4A, UBE4B, UBE2A, RC3H2, CHFR, RNF41, RNF144A, RNF167, RNF126, UBE2T, MKRN1, BIRC2, RNF122	2892	75	12023	1.77379	0.966206	0.24188	0.241443
GOTERM_BP_DIRECT	GO:0018105~peptidyl-serine phosphorylation	42	0.885702	9.54958e-05	GSK3B, CAMK2D, CAB39, MAST3, TNKS, MAST2, MAST1, CAMK2A, STK39, PDGFB, PRKX, STK4, PKD1, GRK2, STK38, MKNK2, CLSPN, PAK2, STK32C, CSNK1G3, MORC3, SYK, PRKCB, PDPK1, PRKCD, DYRK1A, LMTK2, DCLK2, VRK1, CSNK1D, VRK3, MAPK14, TGFBR2, CLK1, LATS1, LATS2, PRKD3, CAMK4, PKN2, MAPKAPK5, PRKD1, MAP3K12	2892	99	12023	1.76372	0.379135	0.0794366	0.0792934
GOTERM_BP_DIRECT	GO:0006357~regulation of transcription from RNA polymerase II promoter	81	1.70814	4.31075e-08	ECM1, GMEB1, GMEB2, SPI1, ARID4A, ARID4B, ELK1, ETS2, NFKBIZ, MLX, EPC1, EPC2, ZNF367, MEN1, MKL2, BRD3, BRD2, PRKCB, MKL1, ARID5A, RFX2, RFX3, ETV2, RFX1, SAFB, RUNX3, MED26, MED6, RBL2, ELF1, ELF2, TFDP1, TFDP2, SLTM, CTDSP1, ELF4, MED20, RFX5, NUPR2, PHIP, ERG, LCORL, ENY2, CBFB, TSHZ3, SATB1, SATB2, GLO1, TCF7, IGHMBP2, NRF1, ELMSAN1, DEAF1, HSF2, TTC21B, SAFB2, TCEAL9, MLXIP, ABCA2, NFE2, TC…	2892	192	12023	1.75387	0.000215126	0.000107575	0.000107381
GOTERM_BP_DIRECT	GO:0007169~transmembrane receptor protein tyrosine kinase signaling pathway	26	0.548292	0.00415884	BLK, ITK, FLT3, TXK, ABL1, STAP1, CSK, JAK2, JAK3, PAG1, JAK1, LYN, SYK, TNK2, INSRR, GAB2, TYK2, BMX, FGR, AHI1, TEC, DOK4, LCK, KIT, LCP2, ROR1	2892	63	12023	1.71572	1	0.741313	0.739977
GOTERM_BP_DIRECT	GO:0032436~positive regulation of proteasomal ubiquitin-dependent protein catabolic process	21	0.442851	0.0113581	PSMD10, GSK3B, ANKIB1, RNF19B, CSNK1D, PSEN1, RCHY1, CBFA2T3, CHFR, PIAS1, RNF144A, GCLC, RNF114, SUMO1, RNF19A, DVL1, ARIH2, STUB1, ARIH1, TRIB1, TRIB2	2892	51	12023	1.71184	1	1	0.998397
GOTERM_BP_DIRECT	GO:0010212~response to ionizing radiation	14	0.295234	0.0459503	DCLRE1C, PAXIP1, BRAT1, EYA3, INTS3, XRCC3, RNF8, USP28, CLK2, STK11, RAD51C, MTA1, RFWD3, UIMC1	2892	34	12023	1.71184	1	1	0.998397
GOTERM_BP_DIRECT	GO:0010501~RNA secondary structure unwinding	15	0.316322	0.0427433	DDX17, DDX6, DDX59, DDX5, DDX3X, DDX24, DDX47, DDX1, DDX23, EIF4A3, DDX42, DDX51, DDX41, DDX50, DDX39B	2892	37	12023	1.6854	1	1	0.998397
GOTERM_BP_DIRECT	GO:0032092~positive regulation of protein binding	19	0.400675	0.0205731	EPHB6, GSK3B, CSF3, RALB, EPB41, AMFR, DERL1, STK4, PKD1, SPPL3, ADD1, ADD2, HERPUD1, SPTA1, KRIT1, EP300, ARHGEF7, RAN, MEN1	2892	47	12023	1.68062	1	1	0.998397
GOTERM_BP_DIRECT	GO:0046777~protein autophosphorylation	44	0.927879	0.000241956	GSK3B, CAMK2D, CAMK2A, PRKX, NLK, STK4, CAMKK2, STK10, PAK1, STK11, SLK, TRIM28, CHEK2, MKNK2, PIM1, PIM2, PAK2, MAP3K3, EIF2AK1, MINK1, INSRR, DYRK1A, LMTK2, VRK1, IRAK3, PASK, CLK4, CLK3, CLK2, CLK1, TAOK3, STK24, CAMK4, STK26, MAK, KIT, TYRO3, MAPKAPK5, PRKD1, CDK12, EPHA1, MAP3K11, DDR2, MAP3K12	2892	109	12023	1.67819	0.70113	0.134178	0.133936
GOTERM_BP_DIRECT	GO:0008360~regulation of cell shape	38	0.80135	0.0010632	SH3KBP1, WIPF1, WIPF2, SEMA3E, ARHGAP15, CORO1A, FGD1, SPTA1, GNA13, PTK2B, ANXA7, MYH10, SEMA4A, CSNK1G3, DMTN, ANXA1, SEMA4D, MYO10, FN1, ARAP3, VRK1, CSNK1D, VRK3, PTK2, FGR, DIAPH1, FMNL1, CDC42EP4, KIT, CDC42EP3, PLXNB2, MYH9, CDC42EP1, PHIP, PLXNB1, BRWD1, EZR, BRWD3	2892	96	12023	1.64561	0.995054	0.331652	0.331054
GOTERM_BP_DIRECT	GO:0035023~regulation of Rho protein signal transduction	26	0.548292	0.00833775	ITSN2, RASGRF1, FGD1, FGD3, PREX1, FGD4, FGD5, ARHGDIB, EPS8L1, ARHGEF11, FARP2, PLEKHG1, PLEKHG5, PLEKHG6, ARHGEF38, MYO9B, VAV1, TIAM2, ARHGEF9, DNMBP, ARHGEF2, ARHGEF7, ECT2L, SOS1, SOS2, ARHGEF6	2892	66	12023	1.63774	1	1	0.998397
GOTERM_BP_DIRECT	GO:0046330~positive regulation of JNK cascade	18	0.379587	0.0342212	SERPINF2, MINK1, NOD2, HMGB1, RASGRP1, TIRAP, RASSF2, RB1CC1, IL1B, PTK2B, CD27, F2RL1, RIPK1, HRAS, MYD88, TLR3, SLAMF1	2892	46	12023	1.62678	1	1	0.998397
GOTERM_BP_DIRECT	GO:0000082~G1/S transition of mitotic cell cycle	16	0.33741	0.0491346	CDKN2D, CDKN1A, CAMK2D, CDKN2C, CDKN1B, CAMK2A, INHBA, PHF8, LATS1, GPR132, LATS2, PIM2, SKP2, CRLF3, CACUL1, EIF4E	2892	41	12023	1.62237	1	1	0.998397
GOTERM_BP_DIRECT	GO:0006511~ubiquitin-dependent protein catabolic process	37	0.780261	0.00216443	CUL9, USP15, USP38, USP31, UBA6, USP32, USP11, USP34, RNF8, HERPUD1, BAG6, USP1, PSMF1, FBXO8, SKP2, RNF20, USP46, USP48, USP7, XBP1, USP49, USP42, USP20, USP21, USP4, USP22, USP3, USP45, UBE4A, UBE4B, USP28, TRPC4AP, CHFR, FBXL12, CYLD, NPLOC4, CUL4B	2892	96	12023	1.6023	0.99998	0.488661	0.48778
GOTERM_BP_DIRECT	GO:0032088~negative regulation of NF-kappaB transcription factor activity	20	0.421763	0.0294364	PIAS4, PSMD10, USP7, NLRC3, IRAK3, ARRB2, SIRT1, COMMD7, NFKBIA, PRDX2, UFL1, CYLD, NLRP12, ITCH, OTULIN, CAT, PELI1, RBCK1, NFKBID, HAVCR2	2892	52	12023	1.59897	1	1	0.998397
GOTERM_BP_DIRECT	GO:0030308~negative regulation of cell growth	28	0.590468	0.00899827	CDA, CDKN1A, DDX3X, BMPR2, CDKN1B, SERPINE2, NAIF1, CDKN2AIP, RERG, TCHP, FLCN, SERTAD3, STK11, FRZB, GNG4, IP6K2, TSPYL2, CDKN2D, SMAD4, CDKN2C, INHBA, SIRT1, SMARCA2, DCBLD2, ST7L, PSRC1, BCL6, CRLF3	2892	73	12023	1.59459	1	1	0.998397
GOTERM_BP_DIRECT	GO:0006338~chromatin remodeling	18	0.379587	0.0419552	DAXX, SMARCD3, SATB1, SATB2, RSF1, CHD1L, GATA3, DEK, ARID1A, SMARCA2, CHD1, MYSM1, ARID1B, TADA2B, CHRAC1, MYB, PADI4, BPTF	2892	47	12023	1.59217	1	1	0.998397
GOTERM_BP_DIRECT	GO:0006915~apoptotic process	26	0.548292	0.0126807	CYFIP2, BRAT1, CIB1, ING4, TCHP, BCLAF1, CASP8, PPP1R13L, CASP1, BNIP2, IFT57, EGLN3, TNFRSF9, SIAH2, SIAH1, PRKCD, HIP1R, TRAF7, STK24, ERCC3, IRF1, STK26, FAS, VDAC1, BIRC6, OGT	2892	68	12023	1.58957	1	1	0.998397
GOTERM_BP_DIRECT	GO:0043161~proteasome-mediated ubiquitin-dependent protein catabolic process	42	0.885702	0.00189811	UBXN2B, NEDD4L, KLHL11, KEAP1, ARRB2, FBXL22, ARNTL, PCNP, RMND5B, RNF115, MAEA, MTA1, RMND5A, PSMB5, BTBD3, BTBD2, PCBP2, RFFL, RNF44, FBXW5, RNF24, UBE2B, FBXL19, SIAH2, SIAH1, KCTD2, BTBD11, BFAR, WWP2, UBE4B, UBE2A, SIRT1, KCTD5, TOPORS, ABTB1, RNF126, UBXN11, KCTD13, STUB1, RBCK1, BIRC2, RNF122	2892	112	12023	1.559	0.999924	0.451118	0.450305
GOTERM_BP_DIRECT	GO:0006974~cellular response to DNA damage stimulus	28	0.590468	0.0133259	BTG2, PHF1, BRAT1, CIB1, PSEN1, CHD2, FOXO1, CDKN2AIP, NIPBL, STK11, HERC2, IKBKG, APBB1, MEN1, CTC1, LYN, NCOA6, NFATC2, CHD1L, BCL6, APC, DDX39B, UBE2T, SPRTN, UBA1, TRIP12, NUPR2, CUL4B	2892	75	12023	1.55207	1	1	0.998397
GOTERM_BP_DIRECT	GO:0007050~cell cycle arrest	19	0.400675	0.0468657	CDKN2D, RB1, NOTCH2, MAP2K1, CDKN2B, CDKN2C, TSG101, ZBTB49, INHBA, FOXO4, PKD1, PPM1G, TBRG1, ERN1, ING4, STK11, APC, IRF1, HRAS	2892	51	12023	1.54881	1	1	0.998397
GOTERM_BP_DIRECT	GO:0001843~neural tube closure	21	0.442851	0.0398314	VASP, SEC24B, SETD2, ST14, FZD3, RARG, APAF1, IFT172, IFT122, SCRIB, BCL10, ARID1A, MED12, MTHFD1, SPINT1, DEAF1, RARA, PLXNB2, IFT57, CC2D2A, KDM6A	2892	57	12023	1.53165	1	1	0.998397
GOTERM_BP_DIRECT	GO:0045893~positive regulation of transcription, DNA-templated	75	1.58161	0.000156182	KDM5A, TGFB1I1, RSF1, ETS2, MECP2, ING5, MECOM, CDH1, CHEK2, ZXDC, GPBP1, CD38, KAT8, ATXN7L3, CEP290, YWHAH, ARHGEF11, DDX17, PCID2, MAP2K1, SMARCC2, TESC, ZNF281, AXIN1, RHOG, DYRK1B, ARID1A, RUNX3, ZFP90, TOPORS, PPM1A, ELF2, PSRC1, KAT6B, KAT6A, WAC, ZNF711, KDM7A, IFNAR1, ENY2, DDX5, RRN3, SMARCD3, CXXC1, PSEN1, BCL10, ARNTL, SERTAD3, DEAF1, DVL1, DVL2, INPP5K, GPBP1L1, APBB1, BANP, BPTF, RN…	2892	210	12023	1.48476	0.541395	0.0974381	0.0972624
GOTERM_BP_DIRECT	GO:0032496~response to lipopolysaccharide	25	0.527204	0.0342309	PTGER4, OTUD5, PTGFR, IL23R, PTGER2, HMGB2, PRDX2, NOCT, CASP1, JUNB, RELT, IL12RB2, AKIRIN2, IRAK3, PPBP, TIRAP, TNFRSF1A, P2RX7, PELI1, FAS, CD27, TNFRSF25, TRIB1, IFNAR1, IDO1	2892	70	12023	1.48476	1	1	0.998397
GOTERM_BP_DIRECT	GO:0042127~regulation of cell proliferation	46	0.970055	0.00413817	BLK, ITK, TXK, PTGER2, TCF7, HP1BP3, CDCA7, PTGS2, GRPR, HHEX, ABL1, PTK2B, CSK, STAT6, E2F4, JAK2, JUNB, RELT, S100A11, JAK1, EGLN3, JUP, TNK2, PLA2G4A, BRAF, PPBP, TYK2, BMX, TOPORS, PTK2, TNFRSF1A, PIAS1, FGR, NFKBIA, CCDC88A, FA2H, RNF126, TEC, BCL6, LCK, MAFG, FAS, CD27, TNFRSF25, DHCR7, PLCD3	2892	130	12023	1.47106	1	0.741313	0.739977
GOTERM_BP_DIRECT	GO:0043123~positive regulation of I-kappaB kinase/NF-kappaB signaling	43	0.90679	0.00715207	ECM1, GOLT1B, SLC20A1, SLC44A2, FASLG, NOD2, BCL10, RELA, CASP8, MIER1, CASP1, ABL1, S100A12, RIPK1, IKBKG, MAP3K7, IKBKE, BRD4, TMED4, MAP3K3, PRKCB, PLEKHG5, CFLAR, ZDHHC17, TIRAP, TNFRSF1A, PPM1A, PINK1, IL1B, TRIM13, REL, PELI1, F2RL1, TAB2, PRKD1, RBCK1, CCDC22, MAP3K14, MYD88, CC2D1A, BIRC2, LTF	2892	123	12023	1.45338	1	1	0.998397
GOTERM_BP_DIRECT	GO:0045892~negative regulation of transcription, DNA-templated	66	1.39182	0.000801552	KDM5B, KDM5C, CDKN1B, LDB1, ZBTB21, HMGB2, ARID4A, HR, RSF1, IKZF4, ING4, MECOM, SUMO1, NKRF, BASP1, SIX5, UIMC1, ZNF280C, CD38, KAT8, NELFCD, KLF10, DAXX, RBFOX2, ZGPAT, RING1, RFX3, ZBTB33, CBFA2T2, COMMD7, CBFA2T3, RUNX2, GREM1, TFDP2, PSPC1, KAT6B, ZNF639, KAT6A, IRF1, CRY2, TRIM11, KHDRBS1, TSG101, PDGFB, PPM1F, ARNTL, BCLAF1, ATXN1, DEAF1, INPP5K, SMARCE1, SMAD2, KDM4A, ZNF263, POU2F1, ZBTB…	2892	189	12023	1.45177	0.981724	0.266703	0.266222
GOTERM_BP_DIRECT	GO:0000122~negative regulation of transcription from RNA polymerase II promoter	117	2.46731	7.73738e-05	RB1, ZNF296, ZNF174, HDAC10, EHMT2, GFI1, ATN1, EHMT1, IKZF1, RPS14, SOX15, MYB, SAP130, WWC3, EPC1, EP300, KMT5A, SOX6, HOXA7, JUNB, MEN1, TLE4, PIAS4, MED1, SMARCC2, KDM2B, PIAS1, BRMS1, RFX5, NUPR2, EZR, PSMD10, NOTCH3, DDX5, CTBP1, CUL3, CTR9, PSEN1, RTF1, GATA2, PHF21A, ZFP57, TPR, E4F1, SUDS3, RBM10, WDTC1, BPTF, HEXIM1, CBX7, LOC100062747, SMAD4, PHF12, ESR2, BMP6, DNAJC17, EFNA1, SNW1, BC…	2892	352	12023	1.38184	0.320357	0.0786063	0.0784646
GOTERM_BP_DIRECT	GO:0035556~intracellular signal transduction	83	1.75032	0.00124825	ITK, DGKE, MAST3, DGKA, MAST2, MAST1, HSPB1, RPS6KA4, PREX1, DSTYK, RPS6KA1, JAK3, RGS6, STK32C, JAK1, UNC13B, WSB1, WSB2, CISH, PRKCB, PDPK1, NFAM1, PRKCD, NSMCE1, IRAK3, OXSR1, TYK2, GMIP, LAX1, NRBP1, TIAM2, NRG4, KIT, RASA2, LCP2, AIDA, ARHGEF2, PRKD1, ARHGEF7, RAF1, PLCB2, DGKH, ARHGEF6, BRSK1, PRKAA1, CAB39, NPR2, STK39, PSEN1, NUAK2, MKNK2, STK38, DVL1, DVL2, PDZD8, PAG1, MARK2, SRPK2, SMA…	2892	252	12023	1.36928	0.998038	0.339458	0.338846
GOTERM_BP_DIRECT	GO:0045087~innate immune response	48	1.01223	0.0151801	BLK, ITK, DDX3X, TXK, LOC100061663, NOD2, HMGB1, BCL10, NLRC4, IPO7, RELA, JCHAIN, TRIM28, CLEC5A, LOC100071074, ABL1, PTK2B, CSK, PGLYRP1, JAK2, JAK3, JAK1, FBXO9, LYN, ANXA1, FCER1G, SYK, TNK2, SH2D1A, TYK2, BMX, ANKHD1, PTK2, FGR, TEC, ELF4, LCK, OTULIN, LCN2, TRIM13, REL, TLR10, SDHAF4, CLEC4E, S100A9, TRIM11, TLR3, S100A8	2892	146	12023	1.36679	1	1	0.998397
GOTERM_BP_DIRECT	GO:0008285~negative regulation of cell proliferation	65	1.37073	0.00613144	RARG, CDKN1A, B4GALT1, BTG1, SERPINE2, LOC100053545, CIB1, RERG, ING4, MTBP, ING5, RASSF5, PIM2, HRAS, MEN1, PBRM1, MAP2K1, TESC, DLEC1, P3H3, CBFA2T3, GTPBP4, RNF41, ZEB1, IRF1, NUPR2, ITGB1BP1, SKAP2, NOTCH2, TSG101, KMT2A, ZBTB49, AMBRA1, FOXO4, STK4, TOB2, TSPAN32, TBRG1, TMEM127, FRZB, ZNF503, PTK2B, CSK, RBM10, CDKN2D, SMAD4, CDKN2C, EIF2AK1, ZBTB16, TNFRSF9, OSM, INHBA, SMAD6, SMARCA2, CHE…	2892	200	12023	1.35113	1	1	0.998397
GOTERM_BP_DIRECT	GO:0030154~cell differentiation	37	0.780261	0.0455552	HEMGN, NOTCH2, BLK, RGS19, NOTCH1, SPI1, FLT3, TXK, ELK1, ETS2, GNA13, PLAGL1, ABL1, PTK2B, CSK, CCHCR1, STX2, JAK1, SYK, TNK2, EYA3, ETV2, TYK2, FOXN2, PRRC2B, PTK2, FLI1, PRRC2A, FGR, TWSG1, ELF1, ELF2, TEC, ELF4, GRB2, DHCR7, ERG	2892	115	12023	1.33758	1	1	0.998397
GOTERM_BP_DIRECT	GO:0001701~in utero embryonic development	46	0.970055	0.0288451	RRN3, NOTCH1, ELL, C2CD3, CHD8, KEAP1, ADAR, GATA3, YBX3, ADD1, GNA13, RIC8A, FLCN, HHEX, COL4A3BP, SIN3A, KIF3A, RDH10, ALKBH1, MYO18B, FLVCR1, INPP5K, SOX6, MYH10, KDM6A, WDTC1, SMAD2, SMAD4, ENDOG, UBE2B, TIE1, OCRL, UBE2A, EIF2S2, MAPK8IP3, HINFP, TGFBR2, MIB1, RCN1, POLG2, MAFG, MYH9, CCM2, TAB1, ZNF335, BMPR1A	2892	144	12023	1.32804	1	1	0.998397
GOTERM_BP_DIRECT	GO:0045944~positive regulation of transcription from RNA polymerase II promoter	152	3.2054	7.87481e-05	RB1, CRTC2, CSF3, CCNT2, GABPB2, CRTC1, FHOD1, ARID4A, ARID4B, UBE3A, IKZF1, GABPB1, IKZF3, IKZF4, RPS6KA4, SOX15, MYB, RPS6KA1, EPC1, CCNL2, CCNL1, SOX6, JUNB, EOMES, MEF2A, MED1, SERPINF2, EBF1, RFX3, PHIP, PRKD1, NOTCH3, DDX5, CBFB, KMT2A, TNKS, AIRE, AGAP2, SUPT4H1, FOXO4, HIF1A, FOXO1, SLC9A1, HELZ2, PLAC8, ATXN7, PCBP1, RPRD1B, RIPK1, CAMTA2, ZNF148, AKIRIN2, PBX2, INHBA, BMP6, ELL3, NFKBIA…	2892	478	12023	1.322	0.325003	0.0786063	0.0784646
GOTERM_BP_DIRECT	GO:0006355~regulation of transcription, DNA-templated	110	2.3197	0.00129227	PRDM4, GTF2B, JMJD1C, HR, PRDM2, ARID4B, YEATS4, NR3C1, IKZF5, HOXA9, ZNF81, DACH1, ZNF606, MYB, GPBP1, SAP130, EP300, SNIP1, ARID2, ZNF169, TLE3, TLE2, RNF44, SFMBT2, EBF1, ZFP69B, EMSY, RUNX2, MAPK8IP1, KAT6B, PSPC1, KAT6A, SUB1, ZNF317, ZNF558, ZNF831, MZF1, NOTCH2, ZNF275, L3MBTL3, NOTCH1, CTR9, CDCA7, NLK, CDKN2AIP, GMCL1, MBTD1, SBNO1, ZNF304, CREBBP, SMAD4, NONO, SMAD6, SMARCA2, CNOT3, ZNF…	2892	350	12023	1.30659	0.998426	0.339458	0.338846
GOTERM_BP_DIRECT	GO:0007264~small GTPase mediated signal transduction	59	1.2442	0.0465512	ARF3, DOCK5, RAB3A, GDI1, RASL11B, DOCK8, RAB3D, RASGRF1, CHM, ARHGAP5, RAPGEFL1, RERG, RND1, RAB43, DOCK11, RAB44, NKIRAS2, RAC2, LOC100057066, TRIM23, ARL10, RALBP1, SH2D3C, RHOH, RHOF, VAV1, RAP2C, RAB37, RAB34, RABL3, DOCK2, SOS1, RAPGEF5, SOS2, RAPGEF6, ARF5, RAB5B, ARL6, AGAP2, RASGRP4, CDC42, RHOT2, RAB40C, RAB23, RAB24, RAB28, RALGDS, REM2, RAB4B, RAB27A, RSG1, RAB11A, RAB11B, MFHAS1, ARH…	2892	197	12023	1.24509	1	1	0.998397

## Sheet: Green Module 
Category	Term	Count	%	PValue	Genes	List Total	Pop Hits	Pop Total	Fold Enrichment	Bonferroni	Benjamini	FDR
GOTERM_BP_DIRECT	GO:0051315~attachment of mitotic spindle microtubules to kinetochore	2	0.00798977	0.0373959	MAD1L1, CHAMP1	115	4	12023	52.2739	1	0.951287	42.7013
GOTERM_BP_DIRECT	GO:2000505~regulation of energy homeostasis	2	0.00798977	0.0465262	NR1D2, NR4A3	115	5	12023	41.8191	1	0.96331	50.1497
GOTERM_BP_DIRECT	GO:0032355~response to estradiol	2	0.00798977	0.0465262	AREG, STAT3	115	5	12023	41.8191	1	0.96331	50.1497
GOTERM_BP_DIRECT	GO:0038061~NIK/NF-kappaB signaling	2	0.00798977	0.0465262	RELB, NFKB2	115	5	12023	41.8191	1	0.96331	50.1497
GOTERM_BP_DIRECT	GO:0000381~regulation of alternative mRNA splicing, via spliceosome	3	0.0119847	0.0249735	RBM8A, THRAP3, RBM7	115	26	12023	12.0632	0.999999	0.93963	30.8945
GOTERM_BP_DIRECT	GO:0019882~antigen processing and presentation	3	0.0119847	0.0268068	RAB8B, RAB35, RELB	115	27	12023	11.6164	1	0.919013	32.769
GOTERM_BP_DIRECT	GO:0006396~RNA processing	3	0.0119847	0.0478565	NRDE2, DHX36, WBP11	115	37	12023	8.47685	1	0.951399	51.1564
GOTERM_BP_DIRECT	GO:0045444~fat cell differentiation	4	0.0159795	0.0159888	TMEM120A, ARID5B, NR4A3, TBL1X	115	56	12023	7.4677	0.99987	0.9493	20.9832
GOTERM_BP_DIRECT	GO:0043161~proteasome-mediated ubiquitin-dependent protein catabolic process	5	0.0199744	0.0217751	RNF4, C8H18ORF25, RNF34, TBL1X, DDIT3	115	112	12023	4.66731	0.999995	0.952862	27.5073
GOTERM_BP_DIRECT	GO:0007264~small GTPase mediated signal transduction	7	0.0279642	0.0110932	RAB8A, RAB8B, RABL6, RAB35, RAP1B, RAPGEF2, RAB20	115	197	12023	3.7149	0.997953	0.997953	15.0405
GOTERM_BP_DIRECT	GO:0045944~positive regulation of transcription from RNA polymerase II promoter	11	0.0439438	0.0152832	CCNK, FOSL2, RNF4, RELB, THRAP3, INO80, DHX36, NFKB2, TBL1X, SUPT5H, NCL	115	478	12023	2.40591	0.999806	0.986072	20.1512
