# Supplementary material for: Transcriptional and Histochemical Signatures of Bone Marrow Mononuclear Cell-Mediated Resolution of Synovitis
Source: Front Immunol. 2021 Dec 8;12:734322. doi: 10.3389/fimmu.2021.734322 (PMC8692379; doi:10.3389/fimmu.2021.734322)
Supplement: Supplementary file 6 [file Table_5.xlsx]

## Sheet: 0-48 hours ISF
Upstream Regulator	Related Module	Expr Log Ratio	Molecule Type	Predicted Activation State	Activation z-score	p-value of overlap	Target Molecules in Dataset	Mechanistic Network
Activated
NFE2L2	gray	0.842	transcription regulator	Activated	6.202	1.76e-19	ABCC1,ABCC4,ABCG2,ACTG1,ALAS2,ALDOA,APPBP2,ARF1,ATF3,ATP1A1,ATP6V0D2,B4GALNT1,BCL2,BCL2L1,BGLAP,BNIP3,CCL11,CCL20,CCL5,CCT3,CCT7,CD36,CD86,CDH1,CDKN1A,CEBPA,CLPTM1L,CREG1,CTSK,CYBB,DAD1,DCSTAMP,DDIT3,DHCR7,DNAJC3,DSTN,EIF2S1,EIF4G2,ENTPD5,EPHX1,ERP29,FABP4,FOXO3,FTH1,FTL,FXYD1,G6PD,GADD45G,GBE1,GHR,GNAI2,GOT1,GPX2,GPX4,GSPT1,GSR,GSS,HAX1,HIPK2,HMBS,HMOX1,HSP90AA1,HSP90AB1,HSP90B1,HSPA9,HYOU1,ICAM…	1200 (16)
LARP1	brown	0.585	translation regulator	Activated	4.914	0.00298	EEF1A1,EIF3A,EIF3F,RACK1,RPL10,RPL14,RPL15,RPL24,RPL31,RPL35,RPL37,RPL37A,RPL4,RPL5,RPS11,RPS12,RPS13,RPS14,RPS19,RPS20,RPS21,RPS3A,RPS4X,RPS6,RPS7,RPS9,TPT1,VIM
PIK3R1	blue	0.503	kinase	Activated	3.791	1.52e-06	ACTA2,ATF5,ATP1A1,BCL2,BCL2L1,CCL3,CCND2,CD36,CXCL12,DDIT3,DNAJB9,DNAJC3,ENG,FOS,HIF1A,HMOX1,HSP90B1,HSPA5,ICAM1,IL1B,MITF,MMP9,NFE2L1,NFE2L2,PIK3CB,PIK3CD,PIK3R1,PKM,PLAU,PPARG,PTEN,PTGS2,SELP,SOD2,TGFB3,TRIB3,VEGFC	1471 (16)
CSF1	brown	2.893	cytokine	Activated	3.745	8.81e-18	ACP5,APOE,APP,AXL,BAX,BCL2,BCL2L1,CCL2,CCL3,CCL5,CCND2,CCND3,CCNE1,CCR1,CCR5,CD163,CD68,CDK4,CDKN1A,CEBPA,CFP,CPM,CSF1,CTNNB1,CTSK,CX3CR1,CYBB,CYP51A1,DHCR7,DUSP1,DUSP4,EBP,EGR1,EGR2,EGR3,ETV3,F2RL1,FAS,FCER1G,FDFT1,FDPS,FOS,GOT2,GPI,GPNMB,GPR34,GPT,GRAP2,HIF1A,HK2,HMGCR,HMGCS1,HSD17B7,HSP90B1,HSPA5,IDI1,IGF1R,IL10,IL10RA,IL18,IL18BP,IL1A,IL1B,IL2RB,IRF4,IRF5,ITGA4,ITGAM,ITGB1,ITGB5,JDP2,JUN,KLF2…	1087 (14)
RUVBL1	blue	0.721	transcription regulator	Activated	3.491	0.00594	CASP3,CCND2,ERGIC1,FAM53C,GADD45B,KDM4B,NUDCD2,PSMA7,PSMB7,PSMC4,PSMD12,QKI,SESN2,SLC39A7,SOCS3,TMEM19,ZDHHC9
SIRT2	blue	0.711	transcription regulator	Activated	3.148	0.0237	DHCR7,FDFT1,HMGCR,IDI1,MVD,MVK,NEDD4,PMVK,SC5D,SQLE
MAFB	blue	3.135	transcription regulator	Activated	3.105	1.28e-05	ACTN1,ADA,ADGRE1,ALCAM,ARHGDIA,CAP1,CCL2,CCND2,CD163,CD28,CNN2,CXCL12,EGR2,GFRA2,GSDMA,HS3ST1,IL10,IL18BP,ITGA2B,ITGB7,LGMN,MAFB,MARCKS,MMP9,NUAK1,OLFML2B,OSCAR,PRDM1,PTGIR,RAB3IL1,RETN,SLC40A1,SLC7A8,SLC9A9,STAB1	553 (7)
EIF4E	turquoise	1.572	translation regulator	Activated	3.101	2.01e-06	ARL11,BAK1,BCL2,BCL2L1,BNIP3,C3AR1,CAPG,CCR5,CDK4,CDKN1A,CEBPA,CEBPB,CTSZ,CUL2,CX3CR1,CXCL16,CYBB,DGUOK,EGLN2,EIF4EBP1,EREG,FBXW2,FOSL1,GPR65,GPS2,GPX2,HIF1A,HMOX1,HMOX2,IL12RB1,IL18,IL1A,ILF2,INSIG1,KAT2B,KLF13,LSM4,LSM6,LYZ,MAPKAPK2,MMP9,NEDD8,NHP2,NRAS,NRP1,NUDT3,ODC1,P2RY13,PHB,PHF5A,PNKP,POP7,PTGES3,RPL35,RPL37A,RPS13,SERTAD1,SIRT2,SKP2,SLC2A5,SPHK1,SRXN1,SVIL,TAPBP,TGFA,UBA7,UBE2A,UBR5,VEGF…	1335 (17)
SCAP	blue	0.503	other	Activated	3.046	5.16e-09	ABCA1,ABCA3,ACAA2,ACACB,ACSL1,ACSL4,ATF3,ATF5,CBLIF,CYB5A,CYP51A1,DDIT3,DHCR7,FABP5,FDFT1,FDPS,HES6,HMGCR,HMGCS1,IDI1,INSIG1,LGALS3,MSMO1,MTHFD2,MVD,MVK,NSDHL,OLR1,PMVK,PTGER4,PTGS2,RDH11,SC5D,SCAP,SLC7A1,SQLE,SQSTM1,SREBF1,STARD4,THRSP,TMEM97,TRIB3	1200 (13)
NFE2L1	brown	1.191	transcription regulator	Activated	2.874	0.0124	HMOX1,NQO1,PSMA1,PSMA6,PSMA7,PSMB1,PSMB6,PSMB7,PSMC2,PSMC3,PSMD1,PSMD11,PSMD12,XPC
GABARAP	green	0.373	transporter	Activated	2.84	0.000377	ABCA2,ARSG,CRYAB,CTSB,GSR,GUSB,INSIG1,LGMN,NAGLU,NPC2,NR1D2,PDGFB,PSAP,SCPEP1,TPP1	38 (2)
ELL2	blue	1.834	transcription regulator	Activated	2.694	1.79e-08	ARFGAP3,CITED2,CLPTM1L,CREB3L2,CRELD2,DNAJB9,DNAJC3,EAF2,EDEM1,ERGIC1,FKBP2,FNDC3B,HDLBP,IRF4,ITM2C,LMAN1,MANF,NUCB1,PON3,PRDM1,RAPGEF3,REXO2,SDC1,SEC24D,SEC61A1,SEL1L,SLC33A1,SLC66A3,TENT5C,TMEM154,UBE2J1
STAT3	green	0.6	transcription regulator	Activated	2.65	0.000126	ACTA2,AHSP,ALAS2,APEX1,AREG,ATP6AP2,BAK1,BATF,BCL2,BCL2L1,BCL6,BNIP3L,CASP3,CASP4,CASP7,CCL11,CCL2,CCL20,CCL5,CCND2,CCNE1,CCR1,CCR5,CCRL2,CD40,CD40LG,CD83,CD86,CDH1,CDKN1A,CDKN2B,CDKN2D,CEBPA,CEBPB,CEP70,CHI3L1,CIITA,CLIC5,CRP,CTSB,CTSK,CTSL,CTTN,CXCL13,DCSTAMP,DDIT3,DLEC1,DLL1,DNMT3A,DPP4,DTX3,DVL3,EED,EGR1,EGR2,EGR3,ETV3,FAS,FCER1G,FGL2,FLRT3,FLT3,FOS,FSCN1,FUT4,GADD45G,GATA3,GBP6,GPR65,GRB10,H…	1453 (15)
CREB3L2	gray	1.162	transcription regulator	Activated	2.425	0.0305	ARF4,ATF5,COPB1,HSPA5,SEC23A,SEC23B
TREM2	blue	5.553	transmembrane receptor	Activated	2.373	1.37e-06	APP,ATP6V0D2,AXL,BAMBI,CCR7,CD36,CD40,CD86,CEBPA,CTSB,CX3CR1,DCSTAMP,FABP4,FABP5,IL10,IL1A,IL1B,LGALS1,LGALS3,LIPA,LOX,LPL,MAMDC2,PTGS2,SCARB1,SULF2,TNFAIP3	1460 (17)
LPL	brown	6.287	enzyme	Activated	2.297	0.000549	ACOX1,BCL2,CASP3,CCL2,CD36,CPT1A,CSF1,FABP4,FOXO3,ICAM1,IL1B,IRS2,LIPE,LPL,MSR1,PNPLA2,PPARG,SCARB1,SLC27A1,THBS1,UCP2,UCP3	1426 (22)
EEF1A2	blue	7.975	translation regulator	Activated	2.236	0.0333	CYBB,IL10,ITGAL,ITGB2,NCF1
TG	turquoise	1.694	other	Activated	2.124	0.0334	CEBPA,CEBPB,CPT1A,CYP7A1,GATA1,IL10,IL18,IL1R2,KLF1,TG,THRSP
LGALS1	blue	3.037	other	Activated	2.107	0.0118	ACTA2,CCND2,CD69,CDKN1A,CXCL16,DHCR7,FIS1,GPCPD1,HBEGF,ICAM1,IFNGR2,IL10,IL1A,IL1B,INSIG1,LAT,LGALS1,LGALS3,MAF,MMP12,MMP9,ROCK1,TFRC,TOX
PPARG	blue	1.674	ligand-dependent nuclear receptor	Activated	2.004	2.67e-07	ABCA1,ABCA3,ABCG2,ACAA2,ACOT8,ACOX1,ACSL1,ACSL4,ACTA2,AKT3,ALDH9A1,APH1A,APOE,APP,ASAP1,ATP2A2,ATP6V1D,BAX,BCL2,BCL2L1,BCL6,BGLAP,CA2,CCL11,CCL2,CCL22,CCL5,CCR7,CD36,CD40,CD68,CDH1,CDKN1A,CEBPA,CEBPB,CPT1A,CR2,CTNNB1,CTSL,CXCL14,CYCS,DGAT1,DGKA,DHRS3,DLAT,DR1,EIF4EBP1,EPHX1,FABP4,FABP5,FAM20C,FDPS,FOSL1,GPD1,GPT,HADHA,HCAR1,HEBP1,HGF,HK2,HMGCR,HMOX1,HSD3B7,HYOU1,ICAM1,IDH1,IL10,IL1B,INSIG1,INSR,I…	1441 (20)
Inactivated
CEBPE	turquoise	-2.137	transcription regulator	Inhibited	-2.159	0.0106	BCL2,BCL2L1,CCND2,CCNE1,CDK4,CEBPB,EPX,GATA1,IL10,IL18,IL5RA,ITGAM,LCN2,LTF,LYZ,MBP,MMP9,NCF1,PTGS2
FOXO3	turquoise	-0.639	transcription regulator	Inhibited	-2.36	2.41e-07	ACTA2,ACVR1,AGFG1,APEX1,ATG9A,ATP6V0D2,BAX,BCL2,BCL2L13,BCL6,BNIP3,BNIP3L,BPGM,BTG1,CASP4,CCND2,CCND3,CDC42EP3,CDH1,CDK4,CDKN1A,CDKN2B,CDKN3,CERS5,CPT1A,CSNK2A2,CTSB,DDIT3,EDNRB,EGR1,EGR2,EIF4EBP1,ELOVL5,ERG,FABP4,FABP5,FOS,FOSB,FOXO3,FOXO4,GADD45B,HBP1,HIF1A,HMGCR,IARS1,ICAM1,IER3,IGF1R,IL10,IL10RB,IL1R1,INHBA,IRS2,ITGAM,ITGB2,JAG1,LARS1,LCN2,MAP1LC3A,MET,MMP9,MTHFD2,MXD3,MXD4,MXI1,NAMPT,NCAPD2,…	1666 (23)
MFN2	grey	-0.578	enzyme	Inhibited	-2.414	0.0237	ACTA2,BAX,BCL2,BNIP3,DDIT3,HIF1A,IL1B,P4HB
TSC22D3	blue	-3.099	transcription regulator	Inhibited	-2.699	0.000405	BCL2,BGLAP,CASP3,CCL2,CCL3,CCL5,CD83,CD86,CDKN1A,CEBPA,DUSP1,EGR2,EGR3,ICAM1,IL10,IL1B,PPARG,PTGS2,RUNX2,SGK1,SMURF1,TLR2	1062 (14)
ALDH2	turquoise	-0.636	enzyme	Inhibited	-3.162	0.0311	ACTA2,ATF5,GSS,MTHFD2,PSAT1,SHMT1,SHMT2,SLC1A4,SLC3A2,SLC7A11
TSC2	turquoise	-0.6	other	Inhibited	-3.332	9.71e-09	ARC,ATF3,ATP6AP2,ATP6V0B,ATP6V0C,ATP6V1D,ATP6V1G1,BAX,BCL2,CCND2,CCND3,CD68,CDKN1A,CREG1,CRYAB,CTNNB1,CXCL12,DDIT3,DPP7,E2F1,EGR1,FOS,GGA2,GLA,GPNMB,GSN,HIF1A,HK2,HMOX1,HSPA5,IFNAR1,IL13RA1,IL1R1,IRS2,JAK2,LDHB,LGALS3,LPAR1,MAOB,NEU1,NFE2L1,NIBAN1,NSDHL,PIAS2,PKIB,PLAU,PLP2,PPP1R3B,PSMA1,PSMB1,PSMC3,PSMD1,PTEN,PTPN11,RASSF4,SCPEP1,SLC14A1,SMPDL3A,SOCS3,SOD2,SPRED1,THRSP,UCP2,WTAP	1185 (21)
PHF12	turquoise	-0.67	transcription regulator	Inhibited	-3.873	0.000866	BRIX1,DIMT1,EIF3A,GTPBP4,IMP4,NOP2,PES1,PIN4,RRS1,SURF6,TBL3,TSR1,UTP11,WDR12,ZNHIT6
GATA1	turquoise	-5.185	transcription regulator	Inhibited	-5.132	1.72e-14	ABCA2,ABCB10,ABCC4,ACTN1,AHSP,ALAS2,ALOX5,ANK1,ARHGAP4,BCL2,BCL2L1,BTG2,BZW2,CA1,CA2,CALR,CBFA2T3,CCL5,CCND2,CCND3,CCR1,CCR3,CCR5,CD164,CD36,CDK4,CDKN1A,CDKN2D,CEBPA,CIITA,CIR1,CNN3,CPD,CREG1,CREM,CYBB,CYFIP1,DMTN,E2F3,EGR1,EPB42,EPOR,EZH2,FAM118A,FECH,FLI1,FOSB,FYB1,GATA1,GATA3,GFI1B,GP1BB,GP9,HBA1/HBA2,HDAC11,HHEX,HIPK2,HNRNPAB,HPSE,HSPA9,IKZF1,IPO5,ITGA2B,JAZF1,JDP2,KDM4A,KLF1,LYZ,MAMDC2,MAP3K…	1221 (22)

## Sheet: 48-96 hours ISF
Upstream Regulator	Related Module	Expr Log Ratio	Molecule Type	Predicted Activation State	Activation z-score	p-value of overlap	Target Molecules in Dataset	Mechanistic Network
Activated
MAFB	blue	0.848	transcription regulator	Activated	3.434	0.0102	CCL2,CD2AP,HS3ST1,LGMN,MAFB,MTSS1,NUAK1,PTGIR,RAB3IL1,SLC7A8,SLC9A9,STAB1
TREM2	blue	1.358	transmembrane receptor	Activated	2.082	0.000693	CCR7,CD36,CD86,CTSB,IL1B,LIPA,LPL,NFKBIA,PTGS2,SCARB1,TNFAIP3	368 (16)
Inactivated
NCOA2	turquoise	-0.807	transcription regulator	Inhibited	-2.484	0.000731	BAZ2A,CCL22,CCR7,CEBPB,FAM89B,GLO1,GPR34,IL1B,IP6K2,IRF1,LPL,MYB,NFKBIA,P2RY13,PLTP,PPP1R3B,PTGS2,RARA,RARG,TPI1,TSC22D3,VDR	544 (19)
TGFA	turquoise	-1.305	growth factor	Inhibited	-2.525	1.94e-07	BIRC3,CCL2,CEBPB,DDX5,E2F1,EREG,FOS,FOSL2,HGF,ICAM1,IGFBP4,JUNB,NES,PECAM1,PLA2G4A,PRNP,PTGS2,RB1,SLPI,TGFA	435 (17)
MAPK3	turquoise	-0.491	kinase	Inhibited	-2.913	0.0035	B4GALT1,CD86,CGA,E2F1,FOS,FOSL2,ITGB1,JUNB,MCL1,MMP1,PIAS1,PLA2G4A,PTGS2	421 (19)
NFKB2	green	-0.638	transcription regulator	Inhibited	-3.127	0.000634	BCL2,BIRC3,CCR7,CD86,CFLAR,FOS,IGFBP4,IL1B,MCL1,MYB,NFKB2,NOD2,ORAI1,PTEN,PTGS2,PXN,RELA,SELL,SOD2,STIM1,VCAM1	261 (13)
RELA	turquoise	-0.574	transcription regulator	Inhibited	-3.589	5.21e-09	ACTA2,BCL2,BIRC3,BNIP3L,BTG2,CASP3,CASP8,CCL2,CCL22,CCR7,CEBPB,CERT1,CTSB,DDIT3,DUSP1,E2F1,FCGRT,FOS,ICA1,ICAM1,IER2,IER3,IFNGR2,IKBKE,IL1B,IL1RN,IRF1,ISG20,JUNB,LYN,LYST,MMP1,MTA1,MYB,NFKB2,NFKBIA,NOD2,NOTCH1,OLR1,ORAI1,PARP1,PECAM1,PLAU,PLK3,PPM1D,PRKCD,PTEN,PTGER4,PTGS2,PXN,RASSF5,RELA,SDC4,SELP,SMAD4,SOD2,SREBF2,STIM1,STK17B,STK4,TANK,TNFAIP3,TPMT,UBE2H,VASP,VCAM1	391 (13)
IL1B	turquoise	-1.719	cytokine	Inhibited	-4.433	1.96e-12	ACOD1,ACTA2,ADAMTS1,ALDH7A1,ALPL,ANGPTL4,ARL6IP5,BCL2,BCL6,BIRC3,BTG2,CASP3,CCL2,CCL22,CCL8,CCR7,CCRL2,CD4,CD86,CEBPB,CFLAR,CTSB,CTSF,CTSZ,CXCL16,CYTIP,DAB2,DDIT3,DDX5,DUSP1,E2F1,E2F2,EFNA1,ENG,EP300,ETS2,ETV1,FERMT3,FOS,G0S2,GADD45A,GLA,GM2A,GNAS,GNL1,GSK3B,GUSB,HELZ2,HEXB,HGF,HPRT1,ICAM1,IDO1,IER2,IER3,IFRD1,IGFBP4,IGFBP6,IKBKE,IL16,IL18,IL18R1,IL18RAP,IL1B,IL1R1,IL1RAP,IL1RN,IL6R,IRAK3,IRF1,IS…	548 (16)

## Sheet: 6-10 days ISF
Upstream Regulator	Related Module	Expr Log Ratio	Molecule Type	Predicted Activation State	Activation z-score	p-value of overlap	Target Molecules in Dataset	Mechanistic Network
Activated
CDKN2A	turquoise	1.657	transcription regulator	Activated	4.787	9e-15	ASF1B,AURKB,BIRC5,BUB1B,CCN2,CCNB1,CCND3,CDC25C,CDCA4,CDCA7L,CDK1,CDKN1A,CDKN2A,CDKN2C,FBXO5,FEN1,GTSE1,H2AX,HMGB2,IL1R2,ITGB3,KIFC1,MCM4,MCM5,MCM7,MELK,MMP1,MMP9,MYBL2,P4HA2,PLK1,PPFIBP1,PTK2B,RRM1,TCF19,TFDP1,TGIF1,TK1	246 (16)
CDKN1A	turquoise	1.517	kinase	Activated	3.575	1.1e-31	ACTB,ANLN,ASPM,AURKB,BIRC5,BUB1,BUB1B,CCN2,CCNB1,CCND3,CDC20,CDC25C,CDC6,CDK1,CDKN1A,CDKN2A,CENPF,CEP55,CIT,CRYAB,DLGAP5,EXO1,FOXM1,H2AX,HJURP,HMGB2,HNRNPA2B1,HSPA5,ITGB3,KIF20A,KIF2C,KNSTRN,LBR,MCM2,MCM3,MCM4,MCM5,MCM6,MCM7,MMP1,MMP9,MYBL2,NUSAP1,ORC1,PBK,PLK1,PRC1,RACGAP1,RAD51,RRM1,SPAG5,TOP2A,TPX2,UBE2C,UHRF1	244 (17)
MEF2D	grey	0.595	transcription regulator	Activated	2.343	0.000244	CCN2,CCND3,CDC6,HDAC9,IKZF1,MCM3,MCM5,MCM6,PPARGC1A	139 (7)
Inactivated
MYBL2	yellow	-1.481	transcription regulator	Inhibited	-2.946	7.44e-08	BIRC5,BUB1,CBX4,CCNB1,CDK1,CDKN2A,FOXM1,MYBL2,PLK1,TOP2A,UBE2C	146 (15)
FOXM1	yellow	-1.513	transcription regulator	Inhibited	-3.817	3.3e-13	AURKB,BIRC5,BUB1B,CCNB1,CDC20,CDC25C,CDCA2,CDCA8,CDK1,CDKN1A,CDKN2A,CENPA,CENPF,FOXM1,GTSE1,HEY2,KIF20A,LOX,MET,MMP9,NEK2,PLK1,PRC1,PRR11,TOP2A	286 (22)
CKAP2L	yellow	-1.069	other	Inhibited	-5.292	6.09e-30	AURKB,BIRC5,BUB1,CCNB1,CDC20,CDCA8,CDK1,CENPA,CENPF,CKAP5,FBXO5,KIF20A,KIF23,KIF2C,LMNB1,NCAPD2,NCAPG,NCAPH,NDC80,NEK2,PLK1,SKA1,SPC24,SPC25,TUBB4B,TUBG1,UBE2C,ZWINT

## Sheet: 0-48 hours
Upstream Regulator	Related Module	Expr Log Ratio	Molecule Type	Predicted Activation State	Activation z-score	p-value of overlap	Target Molecules in Dataset	Mechanistic Network
Activated
NFE2L2	grey	1.181	transcription regulator	Activated	5.684	2.43e-13	ABCC1,ABCC3,ABCG2,ACTG1,ALAS2,APPBP2,ARF1,ATF3,ATP1A1,ATP6V0D2,B4GALNT1,BCL2,BCL2L1,BGLAP,BNIP3,CCL5,CCT3,CD36,CD86,CDKN1A,CLPTM1L,CREG1,CTSK,CYBB,DCSTAMP,DDIT3,DHCR7,DNAJC3,DSTN,EIF4G2,ENTPD5,EPAS1,EPB41,EPHX1,ERP29,FTH1,FTL,FXYD1,GADD45G,GBE1,GCLM,GNAI2,GPX4,GSPT1,GSR,GSS,HERPUD1,HMBS,HMOX1,HPRT1,HSP90AA1,HSP90B1,HSPA9,HYOU1,ICAM1,IDE,IDH1,IFNGR2,IFRD1,IL10,IL1B,IL24,ITGB7,LAMP2,LPL,M6PR,MAP1LC…	895 (16)
LARP1	blue	0.504	translation regulator	Activated	4.147	0.0288	EEF1A1,EIF3A,EIF3F,EIF3H,RACK1,RPL24,RPL31,RPL35,RPL37,RPL37A,RPL4,RPL5,RPS11,RPS13,RPS19,RPS3A,RPS4X,RPS6,RPS7,RPS9,VIM
PIK3R1	blue	0.505	kinase	Activated	4.092	3.56e-07	ATF5,ATP1A1,BCL2,BCL2L1,CCL3,CD36,CXCL12,DDIT3,DNAJB9,DNAJC3,ENG,FOS,HIF1A,HMOX1,HSP90B1,ICAM1,IL1B,MITF,MMP9,NFE2L1,NFE2L2,PIK3CB,PIK3CD,PIK3R1,PLAU,PPARG,PTGS2,SELP,SOD2,TNF,TRIB3,VCAM1,VEGFA,VEGFC	755 (14)
RB1	turquoise	0.5	transcription regulator	Activated	3.904	5.14e-07	ACTB,ADAM10,ALG5,APPL2,ASF1B,ATAD2,ATF3,ATP1A1,ATP1B1,ATP6V1D,ATP6V1F,AURKB,BAK1,BAX,BCL2,BECN1,BGLAP,BNIP3,C9orf116,CAP1,CASP4,CASP7,CCL5,CCND3,CCNE1,CD83,CDCA4,CDCA7L,CDK2,CDKN1A,CHAF1A,CHCHD3,CITED2,CLIC4,DDIT3,DLAT,DNAJC11,DNMT1,DUSP1,E2F1,E2F2,E2F3,E2F4,EGR1,EHD3,EI24,EZH2,FAS,FOS,FOSB,FXYD1,GADD45B,GNAI1,GPR156,GPR157,GPR162,GPR27,GPRC5C,GPS2,GRPEL1,H1-5,H2AX,HIF1A,HSBP1,ID2,IFNGR1,IGF1,IGF…	1262 (21)
MAFB	blue	2.684	transcription regulator	Activated	3.556	3.12e-05	ACTB,ACTN1,ADA,ADGRE1,ALCAM,ARHGDIA,CAP1,CCL2,CD163,CD163L1,CD28,CD38,CNN2,CXCL12,GFRA2,IGF1,IL10,ITGB7,LGMN,MAFB,MARCKS,MMP9,NUAK1,OSCAR,PTGIR,RAB3IL1,RETN,SLC7A8,SLC9A9,STAB1	476 (7)
SIRT2	blue	0.729	transcription regulator	Activated	3.302	0.00161	DHCR7,FDFT1,FNTA,HMGCR,IDI1,MVD,MVK,NEDD4,PMVK,SC5D,SQLE	387 (7)
GABARAP	green	0.482	transporter	Activated	3	6.83e-06	ABCA2,ARSG,BLVRB,CRYAB,CTSB,GSR,GUSB,INSIG1,LGMN,NAGLU,NPC2,NR1D2,PDGFB,PSAP,SCPEP1,TPP1	40 (2)
ELL2	blue	0.769	transcription regulator	Activated	2.711	2.04e-05	ARFGAP3,CITED2,CLPTM1L,CRELD2,DNAJB9,DNAJC3,EDEM1,ERGIC1,FKBP2,FNDC3B,HDLBP,ITM2C,MANF,NUCB1,REXO2,SDC1,SEC24D,SEC61A1,SEL1L,SLC66A3,TENT5C,TMEM154,TRIB1
LPL	brown	4.99	enzyme	Activated	2.475	0.00225	ACOX1,BCL2,CCL2,CD36,ICAM1,IL1B,IRS2,LIPE,LPL,MSR1,PNPLA2,PPARG,SCARB1,SLC27A1,TNF,UCP2,VCAM1,VEGFA	1182 (23)
EIF4E	turquoise	1.272	translation regulator	Activated	2.471	6.81e-06	ARL11,BAK1,BCL2,BCL2L1,BCLAF1,BNIP3,C3AR1,CAPG,CDK2,CDK4,CDKN1A,CEBPB,CTSZ,CUL2,CXCL16,CYBB,EGLN2,EIF4EBP1,EREG,FBXW2,FOXM1,GPR65,GPS2,HIF1A,HMOX1,HMOX2,IL15RA,IL18,INSIG1,KAT2B,LSM4,MAPKAPK2,MMP9,NRAS,NRP1,NUDT3,ODC1,P2RY13,PDS5B,PHB,PHF5A,PNKP,POP7,PTGES3,RB1,RPL35,RPL37A,RPS13,SERTAD1,SIRT2,SLC2A5,SPHK1,SRXN1,SVIL,TAPBP,TGFA,TNF,UBA7,UBE2A,VEGFC	1186 (19)
SELP	turquoise	1.333	transmembrane receptor	Activated	2.422	0.00256	CCL2,CCL3,CDKN1A,CYP1B1,GNA13,IGF1,IL1B,IL4R,PRKCD,SELP,STAT6,THBD,TNF	1437 (18)
NUPR1	grey	1.794	transcription regulator	Activated	2.384	0.000523	ABHD15,ACSS1,ADAM22,ADGRG1,ALDH5A1,ANK1,AREG,ATF3,ATP6V0A1,AVPI1,BNIP3,BRI3BP,BTG1,CCDC77,CD68,CDC23,CDK2,CDK4,CEBPB,CHD4,CITED2,CNPY4,CTPS2,DDIT3,DIPK2A,ELL2,EME1,EREG,ESPL1,FAM111B,FCF1,FLVCR1,FUCA1,GCNT2,GNE,GPSM2,GRAMD2B,H1-5,HBEGF,HFE,HILPDA,HJURP,HK2,HSPA2,IGF1R,IRF2BP2,IRS2,JADE2,JOSD1,KIF20A,KIFC1,KLF4,LHFPL2,LMNB1,MAT2A,MEGF9,MKKS,MMD,MMP12,MYH10,MYO18A,NAAA,NR1D2,NUP50,NUPR1,OSER1,P3H1,…	1231 (17)
EEF1A2	blue	7.965	translation regulator	Activated	2.236	0.0146	CYBB,IL10,ITGAL,ITGB2,NCF1
ELAVL1	blue	0.365	other	Activated	2.195	0.00155	ABCA1,ACHE,ANXA11,ATF3,ATP1B3,BCL2L1,CACHD1,CCL8,CCNE1,CD83,CD86,CDK2,CDKN1A,CTNNB1,CTSS,DGAT1,DUSP1,EIF4G1,ELAVL1,FLNA,FOS,GBP6,GSS,HMOX1,HSPA2,MAT2A,MPEG1,MYBL2,NCL,PCGF2,PLA2G7,PLCG2,PROM1,PTGS2,QARS1,RACK1,RPN2,RPS6,SAT1,SIRT1,SLC7A7,SNRPG,SQSTM1,SULT1C2,TNF,TP53INP1,TSC22D3,VAPB,VCAM1,VEGFA,VIM	1060 (17)
RB1CC1	turquoise	0.646	other	Activated	2.183	0.0344	CCL5,CDKN1A,CDKN2B,RB1,SKIL
SEMA7A	blue	0.52	transmembrane receptor	Activated	2.138	0.0255	BAX,CTSB,CTSS,EGR1,IL18,IL4R,TIMP1,TNF
TREM2	blue	5.008	transmembrane receptor	Activated	2.109	7.17e-06	APP,ATP6V0D2,AXL,BAMBI,CCR7,CD36,CD40,CD86,CTSB,DCSTAMP,FABP5,IL10,IL1B,LGALS1,LGALS3,LIPA,LOX,LPL,PTGS2,SCARB1,SULF2,TNF,TNFAIP3	1215 (17)
BAX	blue	1.545	transporter	Activated	2.102	0.0014	BAK1,BAX,BCL2,CCL5,CDK2,CDKN1A,CTSB,CTSK,CTSS,DNAJB2,DNAJB9,EDEM1,MMP12,MMP9,PDIA6,TIMP1,TNF,TYK2	1074 (20)
RELB	green	2.091	transcription regulator	Activated	2.025	8.08e-06	ANXA5,BCL2,BCL2L1,BECN1,CCR3,CD40,CDKN1A,CHI3L1,CIITA,CXCL12,DMTF1,IL10,IL1B,LTBR,MARCKSL1,MAT2A,MYB,NFKB2,NFKBIB,OLIG2,PTGS2,RELB,SOD2,TBX21,TGFA,TNF,TNFAIP2,TNFRSF1A,TNFSF14	806 (18)
HSP90B1	turquoise	0.751	other	Activated	2.016	0.000281	ARF1,CALR,CD40,CD86,EIF5A2,HSP90B1,IL18,IL1B,ITGA4,ITGAL,ITGB2,PPIF,RAB10,RAB13,RAB15,RAB8B,SLC1A2,SNX12,SSR3,TLR2,TNF	1385 (19)
SMAD2	turquoise	0.487	transcription regulator	Activated	2.005	0.0114	BECN1,BGLAP,CDKN1A,CDKN2B,CYP51A1,FDFT1,FURIN,GADD45B,HMOX1,IGF1,INPP5D,ITGB1,MET,MMP9,PDGFB,RUNX2,S1PR1,S1PR4,SKIL,SMAD2,SMAD3,SPHK1,TNFSF4,TPM1,VEGFA,VEGFC,VIM
CTSZ	brown	2.066	peptidase	Activated	2	0.0459	CD83,CD86,IL10,TNF
Inactivated
CDK2	yellow	-0.741	kinase	Inhibited	-2.173	0.0133	CCND3,CCNE1,CD34,CDK4,CDKN1A,E2F1,FOS,H2AX,MYBL2,RAB27A,RB1,TNF,TNFAIP3,UCP2
LCK	turquoise	-0.979	kinase	Inhibited	-2.205	4.79e-07	ABCA1,BAK1,BCL2L1,CD2,CD5,CISH,CSNK2B,EGR1,EIF6,ELK1,EMG1,FOS,GADD45B,IL2RB,ITGAL,ITGB2,JUN,MMP9,NR1H3,PIK3CD,PLCG2,POP5,POP7,PPARG,RPL4,RUNX1,SCARB1,UTP4,VEGFA,XRN2	670 (16)
TSC22D3	blue	-1.931	transcription regulator	Inhibited	-2.313	0.000637	BCL2,BGLAP,CCL2,CCL3,CCL5,CD83,CD86,CDKN1A,DUSP1,ICAM1,IL10,IL1B,PPARG,PTGS2,RUNX2,SGK1,SMURF1,TLR2,TNF	591 (15)
PROM1	blue	-1.947	other	Inhibited	-2.333	0.00165	DHCR7,FDPS,HMGCS1,IDI1,INSIG1,MVD,NR4A2,NSDHL,SQLE	402 (7)
MFN2	grey	-0.501	enzyme	Inhibited	-2.414	0.00722	BAX,BCL2,BNIP3,DDIT3,HIF1A,IL1B,P4HB,TNF	1206 (19)
RUNX1	blue	-0.675	transcription regulator	Inhibited	-2.418	6.16e-07	ACHE,ADD2,ADGRG1,ALAS2,ALCAM,ANK1,APEX1,BAX,BCL2L12,BGLAP,BLK,BTG2,CCND3,CD160,CD244,CD34,CD79A,CDKN1A,CDKN2B,CHI3L1,DDIT3,EDEM1,ENG,EPAS1,EPB42,ERMAP,EVI5,FAS,FECH,FHDC1,FUT7,GATA1,GFI1B,GPATCH4,HBA1/HBA2,HEMGN,ID2,IL10,IL1B,ITGA4,ITGAL,ITGB1,ITGB2,KLF2,KLRB1,LMO4,MACROH2A1,MET,MYB,MYH10,MYH9,NOP2,PIK3CD,PIK3R1,PLEK,PLXND1,RGCC,RHAG,RUNX1,RUNX2,SEC61A1,SLC24A3,SLC4A1,SOX6,SPP1,SPTA1,SPTB,TAL1,TI…	1074 (19)
ATG16L1	turquoise	-0.439	enzyme	Inhibited	-2.449	0.0355	AOAH,IL18,IL1B,KLHL13,SOD2,SQSTM1
SP110	turquoise	-0.777	transcription regulator	Inhibited	-2.828	0.0327	ANXA5,ATF3,ATM,BCL2L12,CDKN2B,CTSB,E2F1,EEF2K,FER,GNA13,GRN,IFI27,IFNAR1,IL18,IL4R,ING1,ITGB1,LY96,MAP3K3,MYH9,PPARG,RAB15,RXRA,SMAD2,SQSTM1,STAT5A,STIM1,TAF6,TCF3,TIMP1,TNFRSF1A,TRIM28
GATA1	turquoise	-4.736	transcription regulator	Inhibited	-3.965	4.93e-14	ABCA2,ABCB10,ACTN1,AHSP,ALAS2,ALOX5,ALOX5AP,ANK1,ARHGAP4,BATF3,BCL2,BCL2L1,BLVRB,BTG2,CA1,CA2,CALR,CCL5,CCND3,CCR1,CCR3,CD164,CD36,CDK2,CDK4,CDKN1A,CDKN2D,CHCHD6,CIITA,CNN3,CREG1,CXCR3,CYBB,CYFIP1,DMTN,E2F3,EGR1,EPB42,EPOR,ETS2,EZH2,FAM118A,FECH,FOSB,FYB1,GATA1,GFI1B,GP1BB,GP9,HBA1/HBA2,HDAC11,HPSE,HSPA9,IKZF1,IL6ST,JAZF1,KDM4A,KLF1,LMO4,MAP3K5,MBP,MITF,MRTFA,MTHFD1,MYB,NCL,NOP2,NR4A2,NRARP,PECAM…	1008 (24)

## Sheet: 48-96 hours SF
Upstream Regulator	Related Module	Expr Log Ratio	Molecule Type	Predicted Activation State	Activation z-score	p-value of overlap	Target Molecules in Dataset	Mechanistic Network
Activated
TGFBR2	turquoise	1.049	kinase	Activated	2.657	5.71e-05	ACOD1,ADGRE1,ADORA2A,ALOX5,BACE2,C5AR1,CRISPLD2,DGAT2,DYRK2,EMD,EXT2,FAM50A,GADD45B,HSD11B1,ICAM1,IL1B,IL1RAP,ITGAM,KRAS,LBR,LTB4R,MAP2K3,MAP3K11,MBOAT7,MIF4GD,MMP14,MVK,MXD1,NFIL3,NFKBIA,NFKBID,NFKBIZ,ORAI1,P2RY12,PGK1,PLSCR1,PRR7,PTGS2,PTPRC,SDC1,SDF4,SELP,SEMA7A,SH3BP2,SKIL,SLC16A3,SLC39A1,SLC66A2,SMAD4,SOCS3,SPP1,STAT3,TAB2,TGFBR2,UBE3A,UPP1,VEGFA,WFDC2,ZC3H12A,ZNF365	698 (19)
TREM2	blue	1.539	transmembrane receptor	Activated	2.646	0.000456	CD36,CD86,CEBPA,CTSB,IL1B,LGALS1,LIPA,LOX,MAMDC2,NFKBIA,PTGS2,SCARB1,TNFAIP3,TREM1	747 (19)
NR1H3	blue	0.927	ligand-dependent nuclear receptor	Activated	2.395	0.00379	ACOX1,ADGRE1,APOE,ARG2,ARL4C,BCL2L1,CD4,CD47,CD68,CXCL16,CYP7A1,CYTH1,CYTIP,G0S2,GRAP2,HK1,HSD11B1,IFIT2,IL1B,IL1RN,ITGAM,KIF3C,LCP2,MERTK,NFKBIA,NR1H3,PLTP,PTGS2,RARA,RB1,SCARB1,SCD,SREBF2,TRIB1,VEGFA	742 (19)
GABARAPL2	grey	0.397	other	Activated	2.333	0.00103	CTSB,GUSB,LGMN,NAGLU,NPC2,PSAP,SCPEP1,TPP1,UPP1
Inactivated
IL1B	turquoise	-1.515	cytokine	Inhibited	-6.173	6.28e-08	ABCC3,ABCD3,ACOD1,ACP3,ADAMTS1,ALPL,ANXA4,APOE,BCL2L1,BCL6,BIRC3,BTG2,C2,CASP3,CAV2,CCL22,CCRL2,CD4,CD82,CD83,CD86,CEBPA,CEBPB,CFLAR,CHI3L1,CLIP2,CREM,CTSB,CTSF,CTSS,CTSZ,CXCL16,CXCL8,CYP7A1,CYTIP,DBI,DDIT3,DDX5,DR1,DUSP1,E2F2,EGLN1,EGLN3,ENG,EP300,ETS2,FAS,FOS,G0S2,G6PD,GADD45A,GADD45B,GLA,GM2A,GNAS,GSK3B,GUSB,GYS1,HDAC1,HELZ2,HEXB,HPGDS,HSD11B1,ICAM1,ID2,IDH1,IER2,IER3,IFNGR1,IFRD1,IKBKE,IL16,I…	696 (19)
RELA	turquoise	-0.809	transcription regulator	Inhibited	-4.98	6.71e-07	ALCAM,APOE,BCL10,BCL2L1,BECN1,BIRC3,BNIP3L,BTG2,CASP3,CASP8,CCL22,CEBPB,CEMIP2,CERT1,CHI3L1,CTSB,CXCL8,DDIT3,DMTF1,DOCK8,DUSP1,EGLN1,FAS,FCGRT,FOS,ICAM1,IER2,IER3,IFNGR2,IKBKE,IL1B,IL1RN,IL27,IRF1,ISG20,JUNB,LYN,LYST,MDM2,MMP1,MRTFA,MTA1,NF2,NFKB2,NFKBIA,NFKBID,NOD2,NOTCH1,ORAI1,PLK3,PPM1D,PRKCD,PTEN,PTGER4,PTGS2,PTPN6,PXN,RASSF5,RELA,RELB,SELP,SMAD4,SMAP2,SPI1,SREBF2,STIM1,STK17B,STK4,SYTL1,TANK…	520 (12)
PRKCD	turquoise	-0.935	kinase	Inhibited	-3.703	5.66e-08	ARID3B,BCL2L1,BIRC3,CD4,CD68,CEBPB,CTSB,CXCL16,CXCL8,DDIT3,DENND3,ETS2,FOS,FOSL2,ICAM1,IL1B,IL1RN,ITGAM,JUNB,KLF5,KLF6,LYST,MCL1,MYO9B,NFKB2,NFKBIA,NOTCH1,NOTCH2,PDCD4,PDLIM7,PLSCR1,PPP1R15A,PPP1R3D,PTGS2,PTPN6,RELB,SIK3,SPRY1,STAT3,TLR2,VCAM1,VEGFA,ZEB1	451 (12)
MYD88	turquoise	-0.632	other	Inhibited	-3.625	3.21e-07	ACOD1,ACP3,ACSL1,AK3,ALDH1A1,BCL10,CCNL2,CCRL2,CD83,CD86,CFLAR,CTSK,CXCL8,DCLRE1A,DUSP1,ETS2,FBXO30,FOS,HCK,ICAM1,IFIT2,IKBKE,IL18,IL1B,IL1RAP,IL1RN,IL27,IRAK2,IRAK3,IRAK4,IRF1,ITGB7,KDM6B,LPAR1,MMP14,NFKB2,NFKBIA,NFKBIZ,NOD2,PLA2G4A,PSTPIP2,PTGS2,RELA,RELB,SAMHD1,SCARB1,SLC16A3,SLCO3A1,SOCS3,SPP1,TLR2,TNFAIP3,TNFRSF1A,VCAM1,XPA,ZC3H12A	533 (17)
JUNB	turquoise	-1.159	transcription regulator	Inhibited	-3.047	0.0349	C1QB,C5AR1,CD68,CD82,CFLAR,CXCL16,DMTF1,DUSP1,ID2,IL1B,JUNB,LPAR1,MMP1,NCF2,NFKB2,PIM1,PLAUR,PNPLA2,PPP2R2A,RELB,ROCK1,SCD
STAT3	green	-0.634	transcription regulator	Inhibited	-3.046	0.000865	AHSP,ALDH1A1,ARG2,BCL2L1,BCL6,BECN1,BNIP3L,C5AR1,CASP3,CASP7,CCRL2,CD83,CD86,CDKN2D,CEBPA,CEBPB,CFLAR,CHI3L1,CTSB,CTSK,CXCL8,CXCR3,DDIT3,DNM2,FAS,FOS,GADD45A,GIGYF1,GLIPR1,GRB10,HEY1,ICAM1,ID2,IFIT2,IKBKE,IL18R1,IL1B,IL1R1,IL1RN,IL4R,IL6R,IL6ST,IRF1,IRF5,IRF9,ISG20,ITGA6,ITGAM,ITGB1,JAK2,JUNB,KLF5,LOX,MCL1,MITF,MMP1,MYD88,NFKB2,NFKBIZ,NOTCH1,NRP2,OSCAR,PGK1,PIM1,PLA2G4A,PLAUR,PLSCR1,PON2,PROK2,PT…	564 (19)
TGFA	turquoise	-1.921	growth factor	Inhibited	-2.925	0.0015	BCL2L1,BIRC3,CEBPB,CXCL8,DDX3X,DDX5,FOS,FOSL2,ICAM1,ITGAM,JUNB,PLA2G4A,PTGS2,RB1,SLPI,TGFA,VEGFA	427 (16)
SELP	turquoise	-2.095	transmembrane receptor	Inhibited	-2.82	0.000255	BST1,CLK1,CXCL8,HCK,IL1B,IL4R,PLAUR,PRKCD,RELA,SELP,STAT6	694 (18)
FOXO3	turquoise	-0.858	transcription regulator	Inhibited	-2.724	3.79e-06	AGFG1,APAF1,BCL10,BCL6,BECN1,BNIP3L,BTG1,CASP8,CDC42EP3,CFLAR,CSNK2A2,CTSB,CXCL8,DDIT3,ELOVL5,ELOVL7,FOS,FOXO3,FOXO4,GADD45A,GADD45B,GLUL,HBP1,ICAM1,IER3,IL1R1,IP6K2,IRS2,ITGAM,JUNB,LCP2,MAP1LC3A,MAX,MCM7,MXD1,NFKBIA,NRP2,PAK1,PDCD6IP,PDE3B,PIK3CA,PPP1R15A,PRCP,PRKCD,PTEN,PTPRC,RELA,RICTOR,RTN4,SELL,SKP2,SMAD4,SREBF2,STK4,TFDP1,TNFRSF1A,UCP2,ULK1,VCAM1,VEGFA	690 (17)
EP300	turquoise	-1.22	transcription regulator	Inhibited	-2.631	3.85e-06	ADORA2A,ARID5A,BCL2L1,BCL6,BCLAF1,CA12,CBL,CD36,CDC42EP3,CEBPA,CFLAR,CRISPLD2,CXCL8,CYP7A1,DUSP1,EP300,FDX1,FMNL2,FOS,FOSL2,FRMD4B,GLCCI1,GM2A,GNG2,GSK3B,HSD11B1,HVCN1,ID2,IL17RA,IL18R1,IL18RAP,IL1R1,ITGA6,ITGB7,KMO,MAFG,MCF2L,MDM1,MDM2,MMD,MMP1,MYO1F,NFKBIA,NOTCH1,NR3C1,PHIP,PITPNM1,PLA2G4A,PLA2G7,PLEKHA1,PPFIBP2,PRKCD,PTEN,PTGS2,RB1,RCSD1,RGL1,RMND5A,RPS6KA1,SDC1,SKP2,SLAMF6,SLC27A1,SOCS3,ST6GA…	710 (18)
IRF1	turquoise	-1.327	transcription regulator	Inhibited	-2.582	0.00382	ACOD1,CASP3,CASP7,CASP8,CEBPB,CTSS,CXCL16,CXCL8,HELZ2,IFIT2,IL17RA,IL18,IL1B,IL27,IRF1,IRF2,IRF5,IRF9,JAK2,MAP4K4,NFE2,PLAAT3,PTGS2,SAMHD1,SELL,SLPI,SP1,SPI1,STAT3,TMEM140,VCAM1	489 (15)
MAPK3	turquoise	-0.863	kinase	Inhibited	-2.508	0.00257	B4GALT1,CD86,CSTA,CXCL8,FOS,FOSL2,ITGB1,JUNB,JUND,MCL1,MMP1,PIAS1,PLA2G4A,PLAUR,PTGS2,RGS2,SPP1	539 (14)
IL6R	turquoise	-1.894	transmembrane receptor	Inhibited	-2.467	0.000983	ABCC1,ABCC3,BCL2L1,CD36,CXCL8,ICAM1,ICAM3,IL1B,IL6R,IL6ST,IRF1,MCL1,PTGS2,SOCS3,STAT3,TGFBR2,VCAM1,VEGFA	490 (17)
NFKB2	green	-0.709	transcription regulator	Inhibited	-2.437	0.00667	BACE2,BCL2L1,BIRC3,CD83,CD86,CFLAR,CTSS,CXCL8,DMTF1,FOS,IL1B,MCL1,NFKB2,NOD2,ORAI1,PAMR1,PTEN,PTGS2,PXN,RELA,SELL,STIM1,TNFRSF14,VCAM1	350 (13)
DDIT3	green	-1.989	transcription regulator	Inhibited	-2.387	0.0171	ATF7IP2,CEBPA,CFLAR,CXCL8,DDIT3,ERO1A,GABARAPL2,HDAC1,IL1B,IRAK2,ITGAM,LOX,MCL1,NFIL3,PER1,PPP1R15A,SKP2,STAT3,STXBP2,TSC22D3
SAMSN1	turquoise	-2.063	other	Inhibited	-2.357	0.00193	ARID5A,HDAC1,HELZ2,IFIT2,IL18,IRF1,IRF2,ISG20,MERTK,NFKBIZ,PELI1,PTGS2,RILPL1,SAP30,SDC1,SLCO3A1,SOCS3,ZC3H12A	332 (7)
TLR2	blue	-1.004	transmembrane receptor	Inhibited	-2.345	0.00258	CASP3,CD86,CEBPB,CXCL8,CYLD,DUSP1,FOS,GADD45A,HNRNPU,ICAM1,IL18,IL1B,IL1RN,IL27,IRAK3,IRAK4,IRF1,ITGB7,KLF2,MCOLN2,MMP1,MYD88,NLRP12,PTGS2,RELA,SCD,SELP,SIN3A,SOCS3,TLR2,TREM1	444 (13)
DOCK8	turquoise	-0.989	other	Inhibited	-2.324	0.00169	ARID5A,HDAC1,HELZ2,IFIT2,IL18,IRF1,ISG20,MERTK,NFKBIZ,PELI1,PTGS2,REL,RILPL1,SAP30,SLCO3A1
IKBKB	turquoise	-0.964	kinase	Inhibited	-2.3	1.21e-06	ACOD1,BCL2L1,BIRC3,CASP8,CBLB,CEBPB,CFLAR,CTSB,CTSF,CTSK,CTSZ,CXCL16,CXCL8,EGLN1,FAS,FOS,FOXO3,GADD45A,GM2A,ICAM1,IKBKB,IL1B,IL1RN,IRF1,ITGB5,JUNB,KLF5,LMNB1,MDM2,MMP1,MYD88,NAGLU,NFKB2,NFKBIA,PLA2G4A,PLD3,PPM1D,PTEN,PTGS2,PTK2B,RABEP2,REL,RELA,RELB,SEMA3C,SKP2,SOCS3,STAT3,TGFBR2,TIMP2,TLN1,TNFAIP3,VCAM1,VEGFA	502 (13)
NOD2	turquoise	-1.754	other	Inhibited	-2.225	5.08e-05	ACOD1,ACSL1,CXCL8,GPR84,ICAM1,IER3,IL18,IL1B,IL27,ITGAM,KLF2,MCOLN2,NFKB2,NFKBIA,NR1H3,SLC2A6,SOCS3,TANK,TNFAIP3	516 (13)
REL	turquoise	-0.97	transcription regulator	Inhibited	-2.199	3.37e-06	ACSL4,ACSS2,ADK,ARHGEF11,ATXN1,BCL2L1,CD86,CDS2,CILK1,CREM,CRKL,CXCL8,DMTF1,FAS,FOS,FOXO3,FRMD4B,GADD45B,GPT2,H2AJ,ICAM1,IER3,IL18,IL1B,IL27,IRF5,KAT6A,MAFG,NFE2,NFKB2,NFKBIA,NFKBID,PHIP,PIK3CA,PLAAT3,POLB,PPP1R15A,PPP6R3,REL,RELA,RELB,STAT3,STAT5B,TNFAIP3,TTLL1,UBXN2B	684 (18)
CREBBP	turquoise	-1.127	transcription regulator	Inhibited	-2.125	1.88e-06	ADORA2A,ARID5A,ASL,BCL6,CBL,CDC42EP3,CEBPA,CRISPLD2,CXCL8,CXCR3,CYP7A1,DUSP1,FDX1,FMNL2,FOS,FOSL2,FRMD4B,GLCCI1,GM2A,GNAS,GNG2,HSD11B1,HVCN1,IL18R1,IL18RAP,IRF1,ITGA6,ITGB7,JUND,KLF2,KMO,MAFG,MCF2L,MDM1,MDM2,MYO1F,NFKBIA,NOTCH1,NR3C1,OPRM1,PDE3B,PHIP,PITPNM1,PLEKHA1,PPFIBP2,PRKCD,PTGS2,RB1,RCSD1,RGL1,RGS2,RMND5A,RPS6KA1,SDC1,SDHC,SELP,SIN3A,SLAMF6,SOCS3,ST6GAL1,TIPARP,TLR2,TNFAIP3,TSPAN31,VCAM1,V…	724 (17)
IL18	grey	-1.333	cytokine	Inhibited	-2.096	0.00034	ADAM19,BCL2L1,BCL6,CCRL2,CD83,CD86,CFLAR,CXCL16,CXCL8,FAS,FOSL2,GADD45B,ICAM1,IL18,IL18R1,IL18RAP,IL1B,IL22RA2,IRF1,ITGAM,MMP1,NCR1,NFIL3,NFKBIZ,PTEN,PTGS2,RELA,SAMHD1,SELL,SPP1,TAB2,TGFBR2,VCAM1,VEGFA	574 (17)
SP1	turquoise	-0.727	transcription regulator	Inhibited	-2.019	3.19e-05	ABHD2,ACSL1,ACSS1,ADAMTS1,ADCY4,ADH5,ALDH3A2,ALOX5,ALPL,APOE,BACE2,BNIP3L,CASP3,CCL22,CD99,CDKN2D,CEBPA,CEBPB,CENPX,CHI3L1,CIRBP,CREM,CXCL8,DIAPH1,DRG2,ENG,EZR,FAS,FDX1,FOS,GNAS,GSS,HDAC1,HPSE,ICAM1,IFNGR1,IL1B,IL4R,IRAK3,IRF1,IRF3,ITGAM,ITGB5,KLF6,LIPA,LTB4R,MCL1,MECP2,MIER1,MMP1,MMP14,MTA1,NCF2,NFKBIA,PADI4,PEMT,PGK1,PIM1,PLA2G4A,PLAUR,POLB,PREX1,PRKCD,PTGER4,PTGS2,RARA,RASGRP2,RB1,RELA,SCARB1,…	799 (20)
TSPO	turquoise	-1.57	transmembrane receptor	Inhibited	-2	0.00407	ICAM1,TSPO,VCAM1,VDAC1	238 (7)

## Sheet: 6-10 days SF
Upstream Regulator	Related Module	Expr Log Ratio	Molecule Type	Predicted Activation State	Activation z-score	p-value of overlap	Target Molecules in Dataset	Mechanistic Network
Activated
TLR3	turquoise	1.335	transmembrane receptor	Activated	3.074	0.000594	ACOD1,AIM2,CCL2,CD274,CLU,CXCL10,CXCL11,ICAM1,IRF1,PLAU,RGS1,RSAD2,SLPI,STAT1,TLR3,TNC,TNFSF13B	106 (16)
IRF1	turquoise	1.686	transcription regulator	Activated	3.062	4.49e-06	ACOD1,APOL6,C1R,CCL2,CD274,CXCL10,CXCL11,DST,FN1,IRF1,MYB,RSAD2,SLPI,STAT1,STAT2,TAP1,TLR3,TNFSF13B	144 (14)
STAT1	magenta	1.224	transcription regulator	Activated	3.057	1.74e-08	ACOD1,ALDH1A3,APOL6,BATF2,C1R,CCL2,CD274,CEBPD,COL1A1,COL3A1,CXCL10,CXCL11,DCSTAMP,FN1,GBP5,GBP6,ICAM1,IRF1,ITGAX,LY96,PDGFRB,RSAD2,RTP4,SERPING1,STAT1,STAT2,TAP1,TAPBPL,TLR3,TLR8,TNFSF13B	146 (16)
SUCNR1	turquoise	2.189	G-protein coupled receptor	Activated	2.828	1.81e-08	COL1A1,COL1A2,COL3A1,COL4A2,COL5A1,COL5A2,ITGB1,NID1
SEMA7A	blue	0.583	transmembrane receptor	Activated	2.646	1.27e-06	CCN2,CCN4,CCN5,COL1A1,COL1A2,COL3A1,FN1	92 (9)
ITGA11	gray	4.657	other	Activated	2.449	1.52e-05	CCN2,COL1A1,FN1,PDGFRB,SPARC,TNC	146 (7)
ITGB3	brown	1.956	transmembrane receptor	Activated	2.097	7.69e-05	CD274,COL1A1,COL1A2,FN1,ITGB3,MMP2,PLAU,SPARC,UBA52	174 (18)
FN1	turquoise	3.023	enzyme	Activated	2.087	3.93e-05	CAPN2,CCL2,CCN2,CLIC4,COL1A1,COPS5,FN1,ITGB1,ITGB3,MGP,MMP2,NES,PLAU,RRAGD,SCRN1,SDC4,SPARC	188 (21)
SKIL	blue	0.673	transcription regulator	Activated	2	0.00535	CDH11,COL1A2,COL4A1,SKIL,THBS2	78 (7)
